# Supplementary material for: The gut microbiome from patients with schizophrenia modulates the glutamate-glutamine-GABA cycle and schizophrenia-relevant behaviors in mice
Source: PubMed Central journal article supplement (PMC6365110; doi:10.1126/sciadv.aau8317), 2019-02-06
Supplement: aau8317_SM.pdf [file aau8317_SM.pdf]

## Supplementary Materials for

### **The gut microbiome from patients with schizophrenia modulates the glutamate-glutamine-GABA cycle and schizophrenia-relevant behaviors in mice**

Peng Zheng, Benhua Zeng, Meiling Liu, Jianjun Chen, Junxi Pan, Yu Han, Yiyun Liu, Ke Cheng, Chanjuan Zhou, Haiyang Wang, Xinyu Zhou, Siwen Gui, Seth W. Perry, Ma-Li Wong, Julio Licinio\*, Hong Wei\*, Peng Xie\*

\*Corresponding author. Email: xiepeng@cqmu.edu.cn (P.X.); weihong63528@163.com (H.W.); licinioj@upstate.edu (J.L.)

Published 6 February 2019, *Sci. Adv.* **5**, eaau8317 (2019)  
DOI: 10.1126/sciadv.aau8317

#### **This PDF file includes:**

Fig. S1. Gut microbial composition differences between patients with SCZ and HC subjects.

Fig. S2. Impact of confounding variables on global gut microbial phenotypes.

Fig. S3. Comparison of microbial markers between patients with SCZ and major depressive disorder.

Fig. S4. Comparison of gut microbial characteristics between SCZ microbiota and HC microbiota recipient mice.

Fig. S5. Metabolomic analysis of fecal, serum, and hippocampal samples obtained from SCZ microbiota and HC microbiota recipient mice.

Fig. S6. IPA shows that differentially expressed fecal, serum, and hippocampus metabolites were consistently involved in amino acid metabolism, especially glutamate metabolism.

Fig. S7. Levels of glutamine, glutamic acid, and GABA in SCZ microbiota and HC microbiota recipient mice.

Table S1. Detailed clinical characteristics of participants.

Table S2A. Discriminatory OTUs between patients with SCZ and HC subjects.

Table S2B. Discriminatory KEGG pathways between SCZ microbiota and HC microbiota recipient mice.

Table S3A. Differential fecal metabolites between SCZ microbiota and HC microbiota recipient mice.

Table S3B. Differential serum metabolites between SCZ microbiota and HC microbiota recipient mice.

Table S3C. Differential hippocampus metabolites between SCZ microbiota and HC microbiota recipient mice.

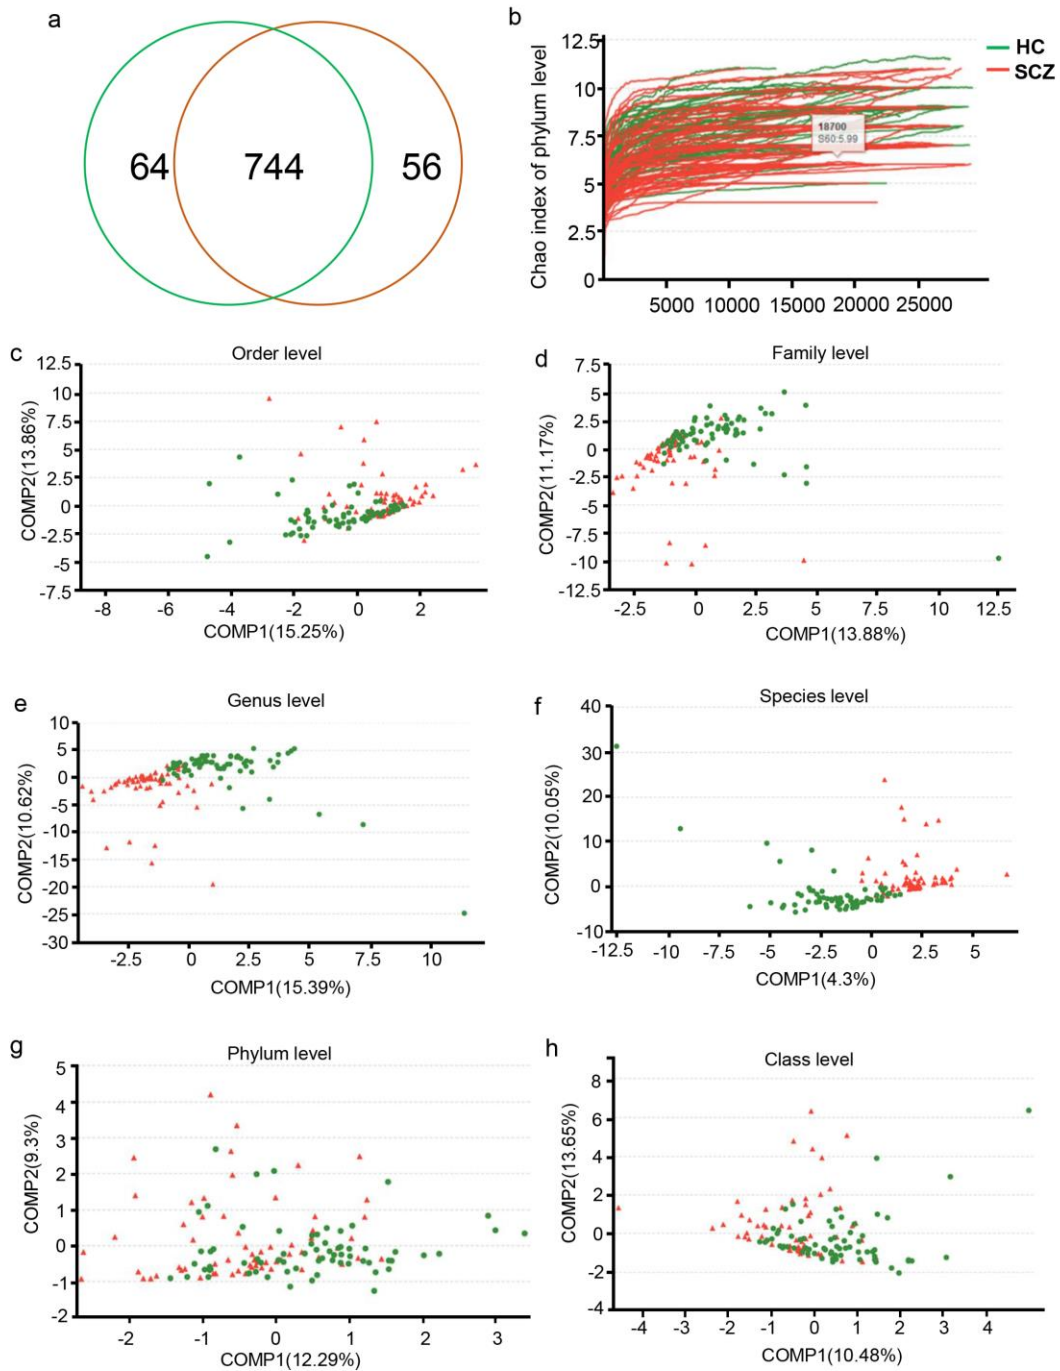

**Fig. S1. Gut microbial composition differences between patients with SCZ and HC subjects.** (a) A Venn diagram showed that 744 of 864 OTUs were detected in the two groups, while 56 and 64 OTUs were unique to SCZ and HC subjects, respectively. (b) The majority of rarefaction curves tended to approach the saturation plateau, suggesting the sequencing depth of the gut microbiome was sufficient. (c-f) The microbial composition of SCZ was significantly different from that in HCs from order to OTU levels (n=69, HC; n=63, SCZ). (g-h) A discriminative trend of gut microbial composition between SCZ and HCs was observed at the phylum or class levels (n=69, HC; n=63, SCZ).

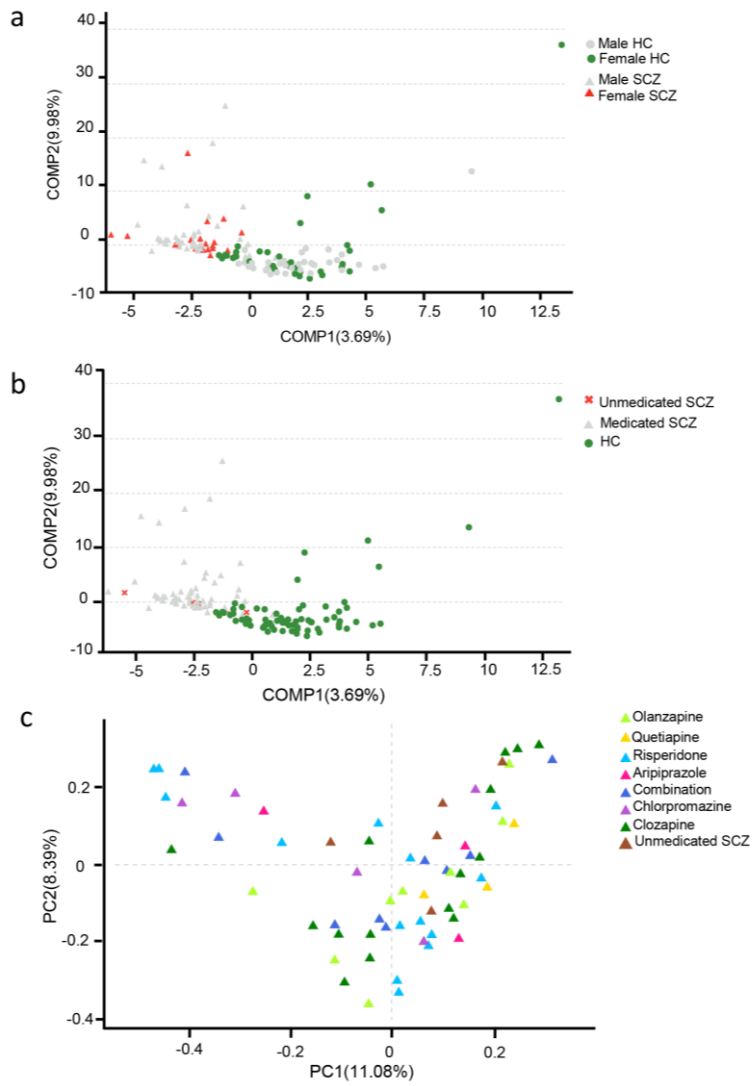

**Fig. S2. Impact of confounding variables on global gut microbial phenotypes.** The global microbial phenotypes were not clustered based on (a) sex, (b) antipsychotic use, or (c) antipsychotic type.

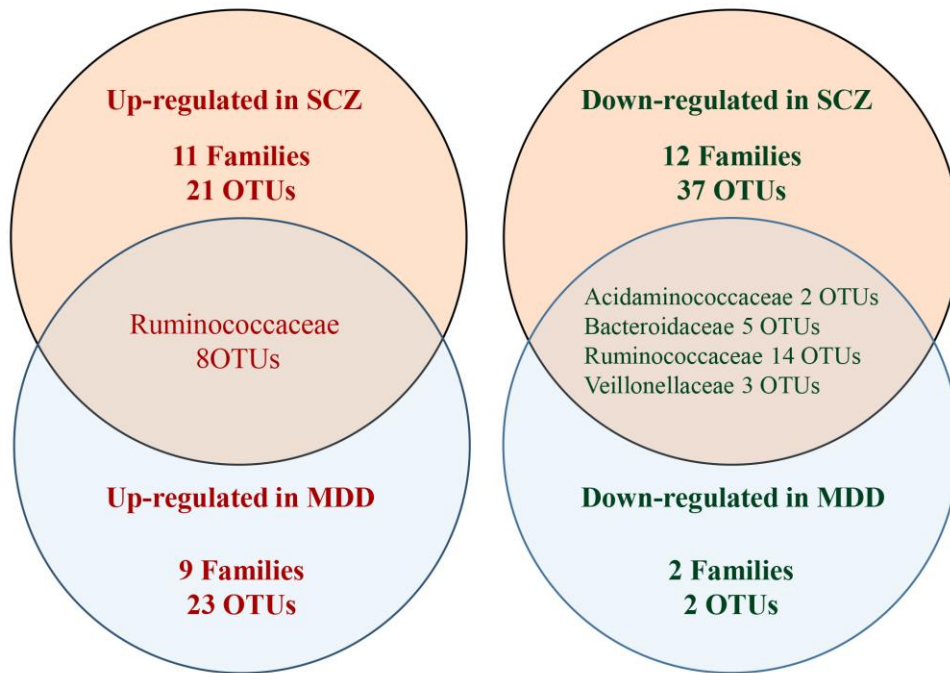

**Fig. S3. Comparison of microbial markers between patients with SCZ and major depressive disorder.** Venn diagram showing that only four microbes including Ruminococcaceae, Acidaminococcaceae, Bacteroidaceae, and Veillonellaceae were synchronous in both SCZ and major depressive disorder (MDD).

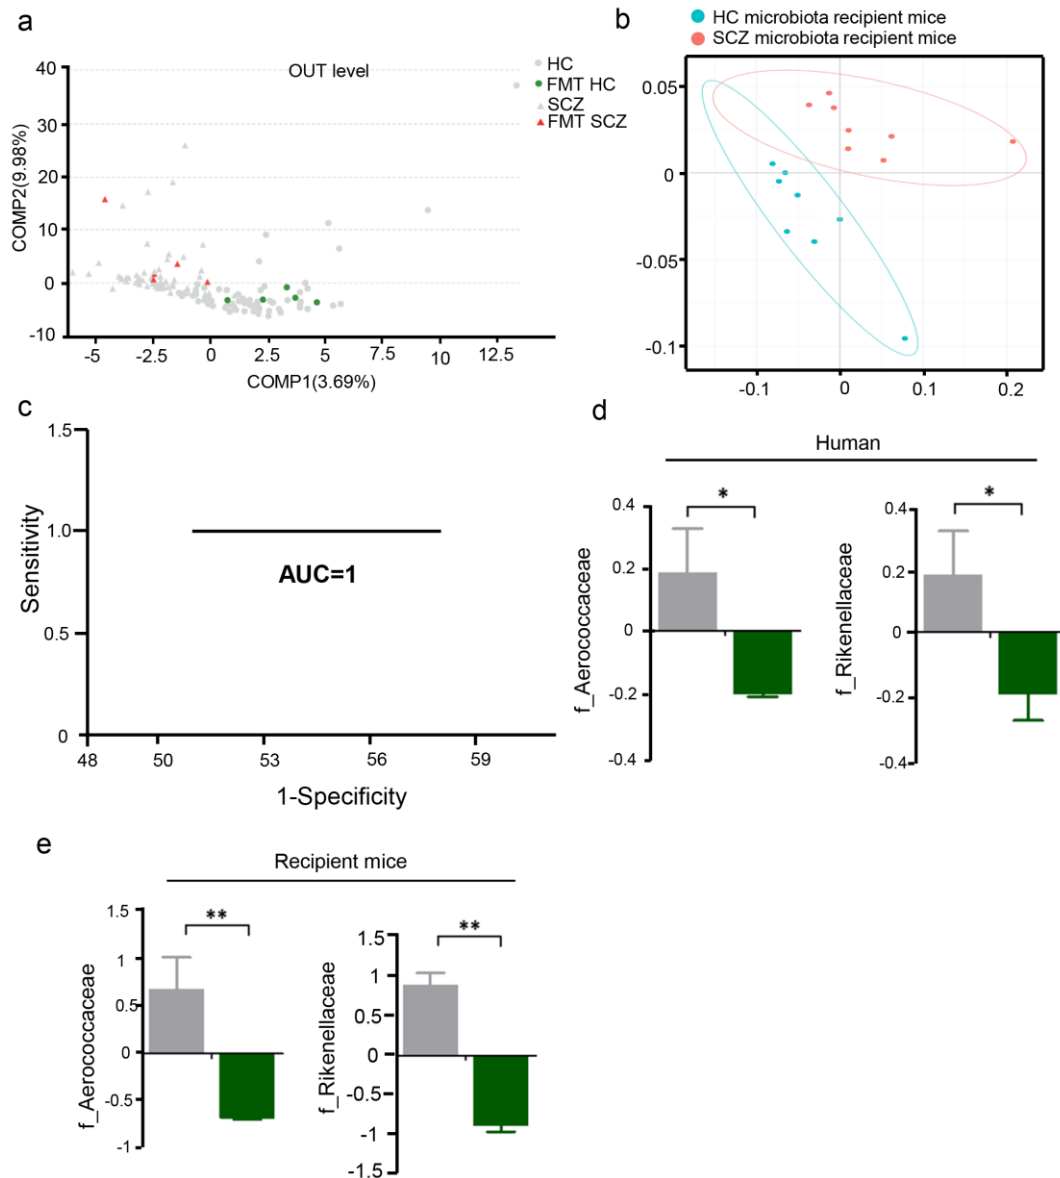

**Fig. S4. Comparison of gut microbial characteristics between SCZ microbiota and HC microbiota recipient mice.** (a) Gut microbial phenotypes of SCZ subjects and HC donors were similar to their corresponding groups. The samples used for fecal microbiota transplantation experiments (n=5 for each group) were representative of their respective populations (n=64, HC; n=58, SCZ); (b) Significant differences were found between the gut microbiotic community compositions of ‘SCZ microbiota’ recipient mice and ‘HC microbiota’ recipient mice (n=8 for each group); (c) The combination of Aerococcaceae and Rikenellaceae completely discriminated ‘SCZ microbiota’ recipient mice from their HC counterparts with an AUC of 1 (i.e. with 100% accuracy) (n=8 for each group); (d-e) The key discriminative microbial markers of SCZ subjects were successfully colonized in the ‘SCZ microbiota’ recipient mice. Comparison of relative abundance of microbial markers. Identical changes in Aerococcaceae and Rikenellaceae composition were seen in both (d) human SCZ subjects (n=69, HC; n=63, SCZ) and in (e) ‘SCZ microbiota’ recipient mice (n=8 for each group). All data were presented as mean  $\pm$  SEM. \*p<0.05, \*\*p<0.01.

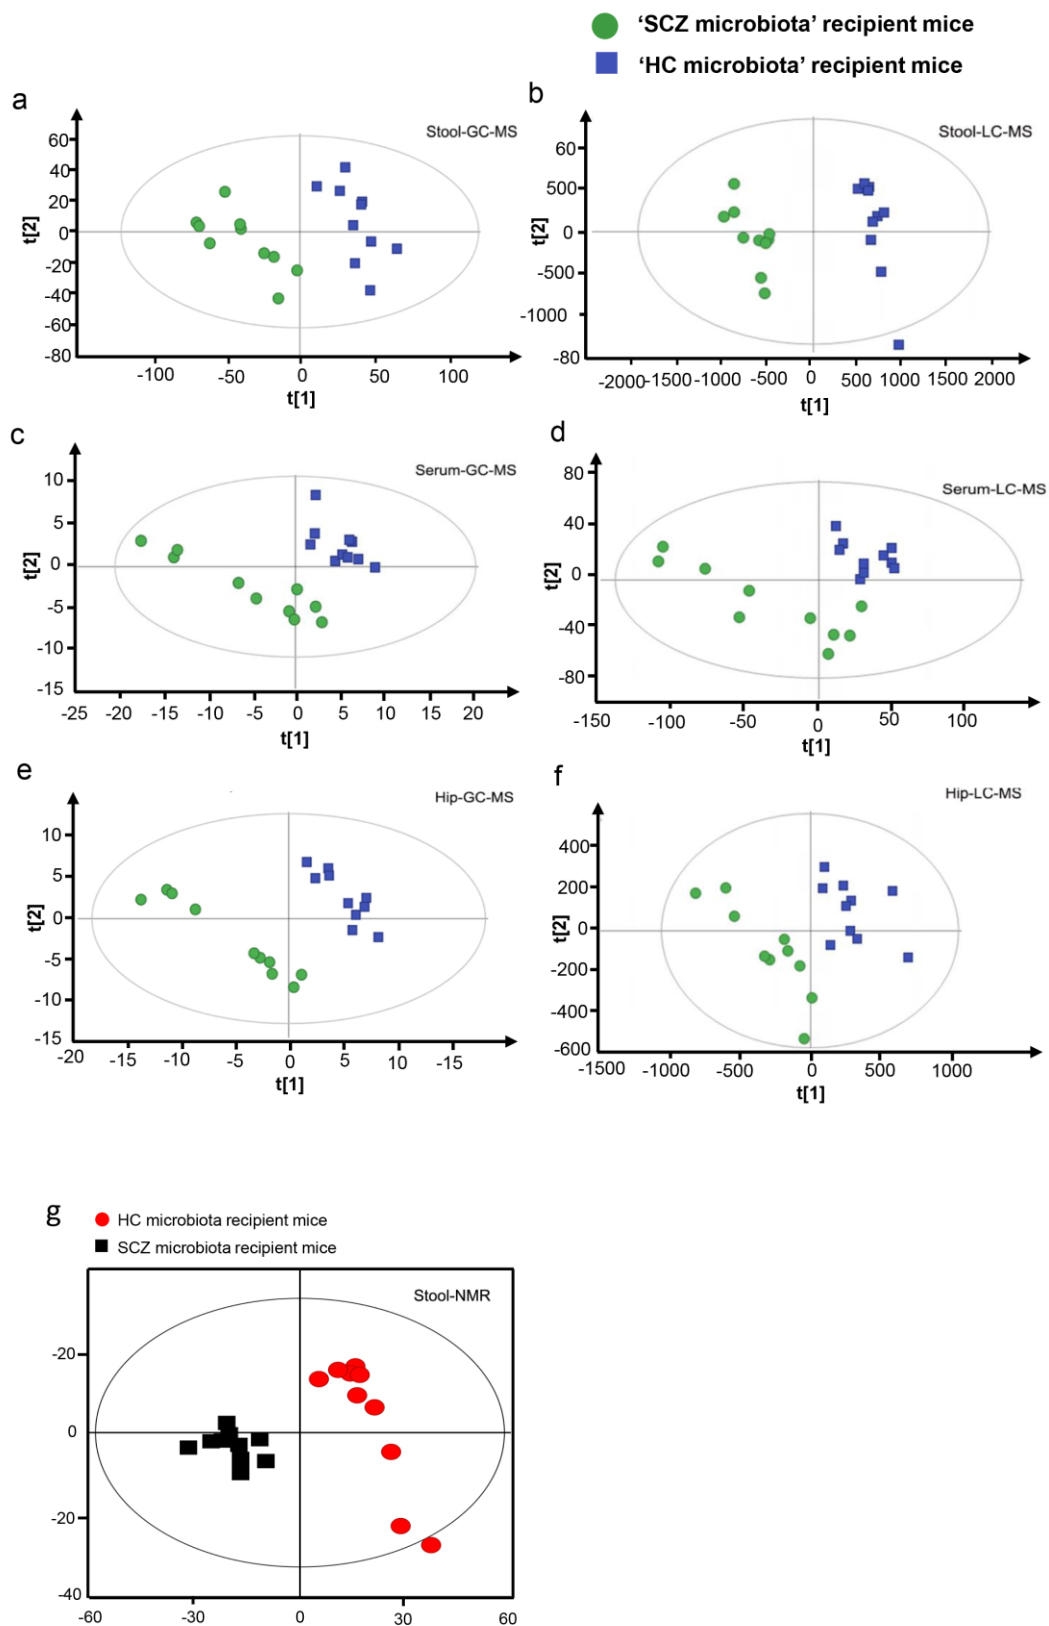

**Fig. S5. Metabolomic analysis of fecal, serum, and hippocampal samples obtained from SCZ microbiota and HC microbiota recipient mice. (a-f) Gas chromatography and liquid mass spectrometry (GC-MS and LC-MS) as well as (g) Nuclear Magnetic Resonance (NMR) based**

metabolomic analyses demonstrate that the metabolic signatures of fecal, serum, and hippocampal samples obtained from 'SCZ microbiota' recipient mice and 'HC microbiota' recipient mice are significantly different.

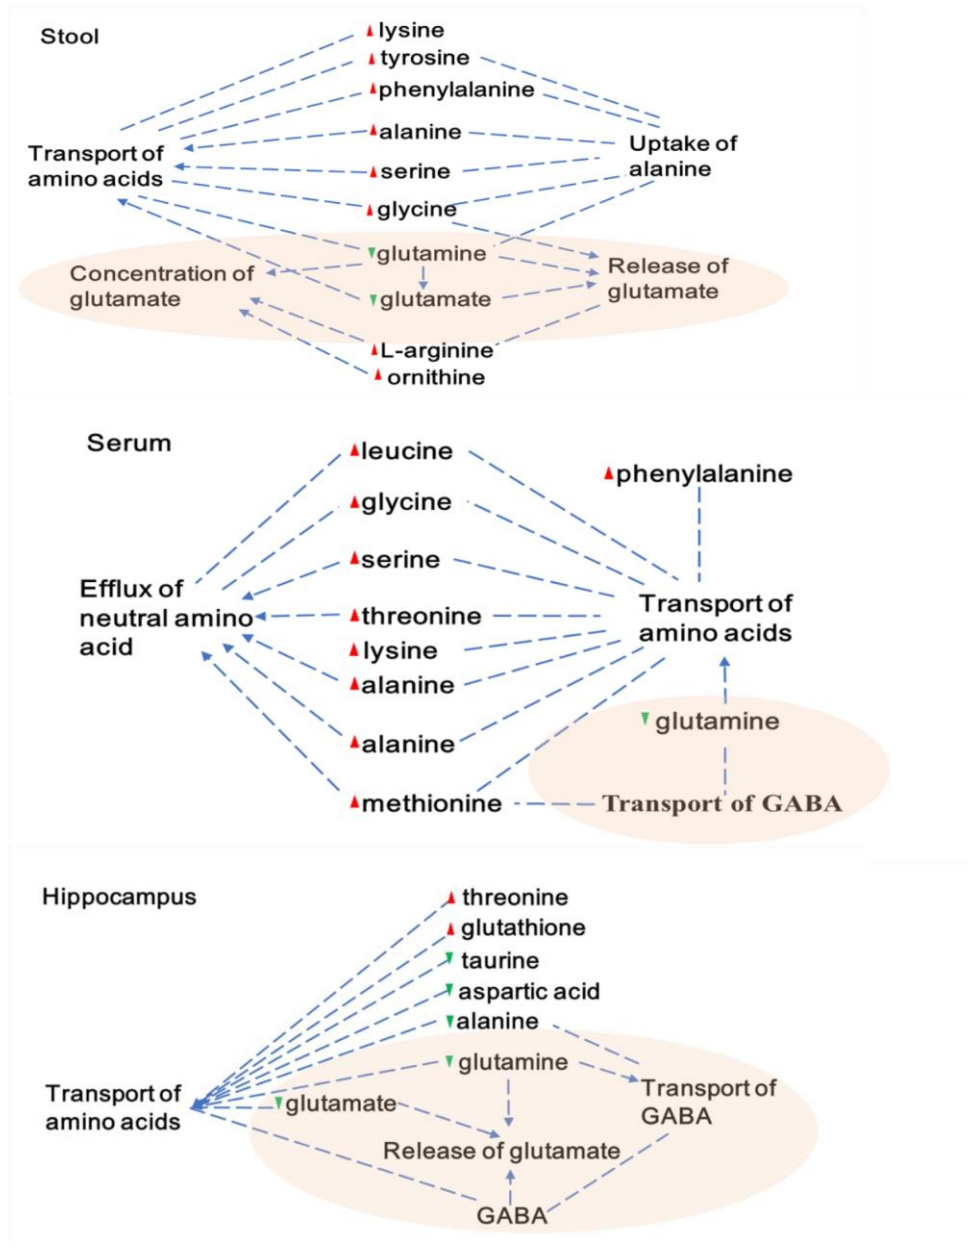

**Fig. S6. IPA shows that differentially expressed fecal, serum, and hippocampus metabolites were consistently involved in amino acid metabolism, especially glutamate metabolism.** IPA analysis showed that ‘SCZ microbiota’ recipient mice were characterized by alterations in the gut-brain glutamate-glutamine-GABA cycle. Red triangles indicate metabolites that were increased in ‘SCZ microbiota’ recipient mice relative to ‘HC microbiota’ recipient mice (n=10 each group). Green triangles indicate metabolites that were decreased in ‘SCZ microbiota’ recipient mice.





**Table S1. Detailed clinical characteristics of participants.**

| Variables <sup>a</sup>       | <i>Cohort 1</i> |            |          | <i>Cohort 2</i> |           |                       |
|------------------------------|-----------------|------------|----------|-----------------|-----------|-----------------------|
|                              | SCZ             | HC         | <i>P</i> | MDD             | HC        | <i>P</i> <sup>b</sup> |
| Sample Size                  | 63              | 69         | -        | 58              | 63        | -                     |
| Sex (M/F)                    | 42/21           | 36/33      | 0.091    | 22/36           | 23/40     | 0.87                  |
| Age (year)                   | 43.49±1.68      | 39.99±1.62 | 0.135    | 40.6±11.7       | 41.8±12.3 | 0.59                  |
| BMI                          | 22.90±0.32      | 23.16±0.33 | 0.585    | 22.0±2.4        | 22.6±2.5  | 0.19                  |
| Medication (Y/N)             | 58/5            | -          | -        | 19/39           | -         | -                     |
| PANSS                        | 71.87±1.85      | -          | -        | -               | -         | -                     |
| Separate/combination therapy | 49/9            | -          | -        | -               | -         | -                     |
| HDRS Scores                  | -               | -          | -        | 22.8±4.4        | 0.3±0.7   | 0.00                  |

<sup>a</sup>Two-tailed student test for continuous variables (age, BMI, and HDRS); Chi-square analyses for categorical variables (sex); values are expressed as the mean ± standard error of the mean; SCZ, schizophrenia subjects; MDD, major depressive disorder; HC, healthy controls; M/F, male/female; Y/N, yes/no; BMI, body mass index; PANSS, Positive and Negative Syndrome Scale Score; HDRS, Hamilton Depression Rating Scale.

**Table S2A. Discriminatory OTUs between patients with SCZ and HC subjects.**

| OTUs   | SCZ<br>Relative to<br>HCs | Taxonomic Assignment                                                                                                                                                         | Discriminative OTUs<br>at the family level |
|--------|---------------------------|------------------------------------------------------------------------------------------------------------------------------------------------------------------------------|--------------------------------------------|
| OTU258 | Down                      | p__Firmicutes; c__Negativicutes; o__Selenomonadales; f__Acidaminococcaceae; g__Phascolarctobacterium;<br>s__unclassified_g__Phascolarctobacterium                            | f__Acidaminococcaceae                      |
| OTU77  | Down                      | p__Bacteroidetes; c__Bacteroidia; o__Bacteroidales; f__Bacteroidaceae; g__Bacteroides; s__Bacteroides_eggerthii                                                              | f__Bacteroidaceae                          |
| OTU400 | Down                      | p__Bacteroidetes; c__Bacteroidia; o__Bacteroidales; f__Bacteroidaceae; g__Bacteroides; s__Bacteroides_massiliensis                                                           | f__Bacteroidaceae                          |
| OTU92  | Down                      | p__Bacteroidetes; c__Bacteroidia; o__Bacteroidales; f__Bacteroidaceae; g__Bacteroides; s__unclassified_g__Bacteroides                                                        | f__Bacteroidaceae                          |
| OTU700 | Down                      | p__Firmicutes; c__Bacilli; o__Lactobacillales; f__Carnobacteriaceae; g__Granulicatella;<br>s__uncultured_organism_g__Granulicatella                                          | f__Carnobacteriaceae                       |
| OTU498 | Down                      | p__Actinobacteria; c__Actinobacteria; o__Coriobacteriales; f__Coriobacteriaceae; g__Collinsella; s__Collinsella_stercoris                                                    | f__Coriobacteriaceae                       |
| OTU26  | Down                      | p__Proteobacteria; c__Gammaproteobacteria; o__Enterobacteriales; f__Enterobacteriaceae; g__Citrobacter;<br>s__unclassified_g__Citrobacter                                    | f__Enterobacteriaceae                      |
| OTU418 | Down                      | p__Proteobacteria; c__Gammaproteobacteria; o__Enterobacteriales; f__Enterobacteriaceae; g__Hafnia;<br>s__uncultured_organism_g__Hafnia                                       | f__Enterobacteriaceae                      |
| OTU224 | Down                      | p__Proteobacteria; c__Gammaproteobacteria; o__Enterobacteriales; f__Enterobacteriaceae; g__Klebsiella;<br>s__unclassified_g__Klebsiella                                      | f__Enterobacteriaceae                      |
| OTU503 | Down                      | p__Proteobacteria; c__Gammaproteobacteria; o__Enterobacteriales; f__Enterobacteriaceae; g__Raoultella;<br>s__Raoultella_ornithinolytica_B6                                   | f__Enterobacteriaceae                      |
| OTU149 | Down                      | p__Firmicutes; c__Erysipelotrichia; o__Erysipelotrichales; f__Erysipelotrichaceae; g__Erysipelotrichaceae_UCG-003;<br>s__uncultured_bacterium_g__Erysipelotrichaceae_UCG-003 | f__Erysipelotrichaceae                     |
| OTU704 | Down                      | p__Firmicutes; c__Bacilli; o__Bacillales; f__Family_XI; g__Gemella; s__Gemella_sanguinis                                                                                     | f__Family_XI                               |

|        |      |                                                                                                                                                                     |                    |
|--------|------|---------------------------------------------------------------------------------------------------------------------------------------------------------------------|--------------------|
| OTU482 | Down | p__Firmicutes; c__Clostridia; o__Clostridiales; f__Lachnospiraceae; g__[Eubacterium]_ventriosum_group;<br>s__unclassified_g__[Eubacterium]_ventriosum_group         | f__Lachnospiraceae |
| OTU477 | Down | p__Firmicutes; c__Clostridia; o__Clostridiales; f__Lachnospiraceae; g__[Eubacterium]_ventriosum_group;<br>s__uncultured_bacterium_g__[Eubacterium]_ventriosum_group | f__Lachnospiraceae |
| OTU279 | Down | p__Firmicutes; c__Clostridia; o__Clostridiales; f__Lachnospiraceae; g__Blautia; s__unclassified_g__Blautia                                                          | f__Lachnospiraceae |
| OTU485 | Down | p__Firmicutes; c__Clostridia; o__Clostridiales; f__Lachnospiraceae; g__Blautia; s__uncultured_Ruminococcus_sp._g__Blautia                                           | f__Lachnospiraceae |
| OTU272 | Down | p__Firmicutes; c__Clostridia; o__Clostridiales; f__Lachnospiraceae; g__Coprococcus_2; s__unclassified_g__Coprococcus_2                                              | f__Lachnospiraceae |
| OTU254 | Down | p__Firmicutes; c__Clostridia; o__Clostridiales; f__Lachnospiraceae; g__Dorea; s__uncultured_bacterium_g__Dorea                                                      | f__Lachnospiraceae |
| OTU129 | Down | p__Firmicutes; c__Clostridia; o__Clostridiales; f__Lachnospiraceae; g__Fusicatenibacter; s__unclassified_g__Fusicatenibacter                                        | f__Lachnospiraceae |
| OTU25  | Down | p__Firmicutes; c__Clostridia; o__Clostridiales; f__Lachnospiraceae; g__Lachnoclostridium;<br>s__Ruminococcus_torques_ATCC_27756                                     | f__Lachnospiraceae |
| OTU259 | Down | p__Firmicutes; c__Clostridia; o__Clostridiales; f__Lachnospiraceae; g__Lachnoclostridium;<br>s__unclassified_g__Lachnoclostridium                                   | f__Lachnospiraceae |
| OTU666 | Down | p__Firmicutes; c__Clostridia; o__Clostridiales; f__Lachnospiraceae; g__Lachnoclostridium;<br>s__unclassified_g__Lachnoclostridium                                   | f__Lachnospiraceae |
| OTU353 | Down | p__Firmicutes; c__Clostridia; o__Clostridiales; f__Lachnospiraceae; g__Lachnospiraceae_NK4A136_group;<br>s__uncultured_organism_g__Lachnospiraceae_NK4A136_group    | f__Lachnospiraceae |
| OTU853 | Down | p__Firmicutes; c__Clostridia; o__Clostridiales; f__Lachnospiraceae; g__Lachnospiraceae_UCG-010;<br>s__uncultured_organism_g__Lachnospiraceae_UCG-010                | f__Lachnospiraceae |
| OTU111 | Down | p__Firmicutes; c__Clostridia; o__Clostridiales; f__Lachnospiraceae; g__unclassified_f__Lachnospiraceae;<br>s__unclassified_f__Lachnospiraceae                       | f__Lachnospiraceae |
| OTU337 | Down | p__Firmicutes; c__Clostridia; o__Clostridiales; f__Lachnospiraceae; g__unclassified_f__Lachnospiraceae;<br>s__unclassified_f__Lachnospiraceae                       | f__Lachnospiraceae |
| OTU623 | Down | p__Firmicutes; c__Clostridia; o__Clostridiales; f__Lachnospiraceae; g__unclassified_f__Lachnospiraceae;<br>s__unclassified_f__Lachnospiraceae                       | f__Lachnospiraceae |

|        |      |                                                                                                                                                                                                  |                        |
|--------|------|--------------------------------------------------------------------------------------------------------------------------------------------------------------------------------------------------|------------------------|
| OTU629 | Down | p__Firmicutes; c__Clostridia; o__Clostridiales; f__Lachnospiraceae; g__unclassified_f__Lachnospiraceae; s__unclassified_f__Lachnospiraceae                                                       | f__Lachnospiraceae     |
| OTU170 | Down | p__Proteobacteria; c__Alphaproteobacteria; o__Rhizobiales; f__Methylobacteriaceae; g__Methylobacterium; s__unclassified_g__Methylobacterium                                                      | f__Methylobacteriaceae |
| OTU341 | Down | p__Tenericutes; c__Mollicutes; o__Mollicutes_RF9; f__norank_o__Mollicutes_RF9; g__norank_o__Mollicutes_RF9; s__uncultured_bacterium_g__norank_o__Mollicutes_RF9                                  | f__norank              |
| OTU147 | Down | p__Saccharibacteria; c__norank_p__Saccharibacteria; o__norank_p__Saccharibacteria; f__norank_p__Saccharibacteria; g__norank_p__Saccharibacteria; s__Candidatus_Saccharibacteria_bacterium_UB2523 | f__norank              |
| OTU42  | Down | p__Saccharibacteria; c__norank_p__Saccharibacteria; o__norank_p__Saccharibacteria; f__norank_p__Saccharibacteria; g__norank_p__Saccharibacteria; s__TM7_phylum_sp__oral_clone_DR034              | f__norank              |
| OTU41  | Down | p__Saccharibacteria; c__norank_p__Saccharibacteria; o__norank_p__Saccharibacteria; f__norank_p__Saccharibacteria; g__norank_p__Saccharibacteria; s__TM7_phylum_sp__oral_clone_FR058              | f__norank              |
| OTU138 | Down | p__Saccharibacteria; c__norank_p__Saccharibacteria; o__norank_p__Saccharibacteria; f__norank_p__Saccharibacteria; g__norank_p__Saccharibacteria; s__unclassified_g__norank_p__Saccharibacteria   | f__norank              |
| OTU367 | Down | p__Saccharibacteria; c__norank_p__Saccharibacteria; o__norank_p__Saccharibacteria; f__norank_p__Saccharibacteria; g__norank_p__Saccharibacteria; s__unclassified_g__norank_p__Saccharibacteria   | f__norank              |
| OTU521 | Down | p__Proteobacteria; c__Gammaproteobacteria; o__Pasteurellales; f__Pasteurellaceae; g__Haemophilus; s__Haemophilus_parainfluenzae_T3T1                                                             | f__Pasteurellaceae     |
| OTU230 | Down | p__Bacteroidetes; c__Bacteroidia; o__Bacteroidales; f__Porphyromonadaceae; g__Barnesiella; s__unclassified_g__Barnesiella                                                                        | f__Porphyromonadaceae  |
| OTU537 | Down | p__Bacteroidetes; c__Bacteroidia; o__Bacteroidales; f__Porphyromonadaceae; g__Odoribacter; s__Odoribacter_splanchnicus_DSM_20712                                                                 | f__Porphyromonadaceae  |
| OTU677 | Down | p__Bacteroidetes; c__Bacteroidia; o__Bacteroidales; f__Rikenellaceae; g__Alistipes; s__Alistipes_putredinis_DSM_17216                                                                            | f__Rikenellaceae       |
| OTU231 | Down | p__Firmicutes; c__Clostridia; o__Clostridiales; f__Ruminococcaceae; g__[Eubacterium]_coprostanoligenes_group; s__uncultured_bacterium_g__[Eubacterium]_coprostanoligenes_group                   | f__Ruminococcaceae     |

|        |      |                                                                                                                                                                                   |                       |
|--------|------|-----------------------------------------------------------------------------------------------------------------------------------------------------------------------------------|-----------------------|
| OTU680 | Down | p__Firmicutes; c__Clostridia; o__Clostridiales; f__Ruminococcaceae; g__[Eubacterium]_coprostanoligenes_group;<br>s__uncultured_bacterium_g__[Eubacterium]_coprostanoligenes_group | f__Ruminococcaceae    |
| OTU235 | Down | p__Firmicutes; c__Clostridia; o__Clostridiales; f__Ruminococcaceae; g__Ruminiclostridium;<br>s__uncultured_organism_g__Ruminiclostridium                                          | f__Ruminococcaceae    |
| OTU181 | Down | p__Firmicutes; c__Clostridia; o__Clostridiales; f__Ruminococcaceae; g__Ruminococcaceae_UCG-005;<br>s__uncultured_prokaryote_g__Ruminococcaceae_UCG-005                            | f__Ruminococcaceae    |
| OTU789 | Down | p__Firmicutes; c__Clostridia; o__Clostridiales; f__Ruminococcaceae; g__Ruminococcaceae_UCG-013;<br>s__uncultured_organism_g__Ruminococcaceae_UCG-013                              | f__Ruminococcaceae    |
| OTU276 | Down | p__Firmicutes; c__Clostridia; o__Clostridiales; f__Ruminococcaceae; g__Ruminococcaceae_UCG-014;<br>s__unclassified_g__Ruminococcaceae_UCG-014                                     | f__Ruminococcaceae    |
| OTU405 | Down | p__Firmicutes; c__Clostridia; o__Clostridiales; f__Ruminococcaceae; g__Ruminococcaceae_UCG-014;<br>s__uncultured_bacterium_g__Ruminococcaceae_UCG-014                             | f__Ruminococcaceae    |
| OTU813 | Down | p__Firmicutes; c__Clostridia; o__Clostridiales; f__Ruminococcaceae; g__Ruminococcaceae_UCG-014;<br>s__uncultured_organism_g__Ruminococcaceae_UCG-014                              | f__Ruminococcaceae    |
| OTU389 | Down | p__Firmicutes; c__Clostridia; o__Clostridiales; f__Ruminococcaceae; g__Ruminococcaceae_UCG-014;<br>s__uncultured_Ruminococcaceae_bacterium_g__Ruminococcaceae_UCG-014             | f__Ruminococcaceae    |
| OTU766 | Down | p__Firmicutes; c__Clostridia; o__Clostridiales; f__Ruminococcaceae; g__Ruminococcus_1; s__Ruminococcus_bicirculans                                                                | f__Ruminococcaceae    |
| OTU725 | Down | p__Firmicutes; c__Clostridia; o__Clostridiales; f__Ruminococcaceae; g__Ruminococcus_2;<br>s__uncultured_bacterium_g__Ruminococcus_2                                               | f__Ruminococcaceae    |
| OTU526 | Down | p__Firmicutes; c__Clostridia; o__Clostridiales; f__Ruminococcaceae; g__uncultured_f__Ruminococcaceae;<br>s__unclassified_g__uncultured_f__Ruminococcaceae                         | f__Ruminococcaceae    |
| OTU834 | Down | p__Firmicutes; c__Bacilli; o__Lactobacillales; f__Streptococcaceae; g__Streptococcus; s__Streptococcus_salivarius                                                                 | f__Streptococcaceae   |
| OTU395 | Down | p__Firmicutes; c__Bacilli; o__Lactobacillales; f__Streptococcaceae; g__Streptococcus; s__unclassified_g__Streptococcus                                                            | f__Streptococcaceae   |
| OTU191 | Down | p__Firmicutes; c__Negativicutes; o__Selenomonadales; f__Veillonellaceae; g__Dialister; s__unclassified_g__Dialister                                                               | f__Veillonellaceae    |
| OTU474 | Up   | p__Firmicutes; c__Negativicutes; o__Selenomonadales; f__Acidaminococcaceae; g__Acidaminococcus;<br>s__uncultured_organism_g__Acidaminococcus                                      | f__Acidaminococcaceae |

|        |    |                                                                                                                                         |                       |
|--------|----|-----------------------------------------------------------------------------------------------------------------------------------------|-----------------------|
| OTU829 | Up | p__Proteobacteria; c__Betaproteobacteria; o__Burkholderiales; f__Alcaligenaceae; g__Sutterella; s__Sutterella_wadsworthensis_2_1_59BFAA | f__Alcaligenaceae     |
| OTU832 | Up | p__Actinobacteria; c__Actinobacteria; o__Bifidobacteriales; f__Bifidobacteriaceae; g__Alloscardovia; s__Alloscardovia_omnicolens        | f__Bifidobacteriaceae |
| OTU172 | Up | p__Bacteroidetes; c__Bacteroidia; o__Bacteroidales; f__Bacteroidaceae; g__Bacteroides; s__Bacteroides_cellulosilyticus_DSM_14838        | f__Bacteroidaceae     |
| OTU849 | Up | p__Bacteroidetes; c__Bacteroidia; o__Bacteroidales; f__Bacteroidaceae; g__Bacteroides; s__Bacteroides_thetaiotaomicron                  | f__Bacteroidaceae     |
| OTU86  | Up | p__Bacteroidetes; c__Bacteroidia; o__Bacteroidales; f__Bacteroidaceae; g__Bacteroides; s__unclassified_g__Bacteroides                   | f__Bacteroidaceae     |
| OTU622 | Up | p__Firmicutes; c__Clostridia; o__Clostridiales; f__Clostridiaceae_1; g__Sarcina; s__uncultured_Sarcina_sp._g__Sarcina                   | f__Clostridiaceae_1   |
| OTU15  | Up | p__Actinobacteria; c__Actinobacteria; o__Coriobacteriales; f__Coriobacteriaceae; g__Atopobium; s__unclassified_g__Atopobium             | f__Coriobacteriaceae  |
| OTU614 | Up | p__Actinobacteria; c__Actinobacteria; o__Coriobacteriales; f__Coriobacteriaceae; g__uncultured_f__Coriobacteriaceae; s__metagenome      | f__Coriobacteriaceae  |
| OTU759 | Up | p__Bacteroidetes; c__Flavobacteriia; o__Flavobacteriales; f__Flavobacteriaceae; g__Flavobacterium; s__Flavobacterium_anhuiense          | f__Flavobacteriaceae  |
| OTU780 | Up | p__Fusobacteria; c__Fusobacteriia; o__Fusobacteriales; f__Fusobacteriaceae; g__Fusobacterium; s__unclassified_g__Fusobacterium          | f__Fusobacteriaceae   |
| OTU592 | Up | p__Bacteroidetes; c__Bacteroidia; o__Bacteroidales; f__Prevotellaceae; g__Alloprevotella; s__uncultured_organism_g__Alloprevotella      | f__Prevotellaceae     |
| OTU455 | Up | p__Bacteroidetes; c__Bacteroidia; o__Bacteroidales; f__Prevotellaceae; g__Prevotella_7; s__uncultured_organism_g__Prevotella_7          | f__Prevotellaceae     |
| OTU407 | Up | p__Bacteroidetes; c__Bacteroidia; o__Bacteroidales; f__Prevotellaceae; g__Prevotella_9; s__uncultured_bacterium_g__Prevotella_9         | f__Prevotellaceae     |
| OTU662 | Up | p__Bacteroidetes; c__Bacteroidia; o__Bacteroidales; f__Prevotellaceae; g__Prevotella_9; s__uncultured_bacterium_g__Prevotella_9         | f__Prevotellaceae     |

|        |    |                                                                                                                                        |                        |
|--------|----|----------------------------------------------------------------------------------------------------------------------------------------|------------------------|
| OTU184 | Up | p__Firmicutes; c__Clostridia; o__Clostridiales; f__Ruminococcaceae; g__[Eubacterium]_coprostanoligenes_group; s__human_gut_metagenome  | f__Ruminococcaceae     |
| OTU727 | Up | p__Firmicutes; c__Clostridia; o__Clostridiales; f__Ruminococcaceae; g__Flavonifractor; s__Flavonifractor_plautii                       | f__Ruminococcaceae     |
| OTU690 | Up | p__Firmicutes; c__Negativicutes; o__Selenomonadales; f__Veillonellaceae; g__Dialister; s__human_gut_metagenome                         | f__Veillonellaceae     |
| OTU639 | Up | p__Firmicutes; c__Negativicutes; o__Selenomonadales; f__Veillonellaceae; g__Dialister; s__uncultured_bacterium_g__Dialister            | f__Veillonellaceae     |
| OTU457 | Up | p__Firmicutes; c__Negativicutes; o__Selenomonadales; f__Veillonellaceae; g__Megasphaera; s__Megasphaera_elsdenii_DSM_20460             | f__Veillonellaceae     |
| OTU84  | Up | p__Firmicutes; c__Negativicutes; o__Selenomonadales; f__Veillonellaceae; g__Megasphaera; s__unclassified_g__Megasphaera                | f__Veillonellaceae     |
| OTU778 | Up | p__Firmicutes; c__Negativicutes; o__Selenomonadales; f__Veillonellaceae; g__Veillonella; s__unclassified_g__Veillonella                | f__Veillonellaceae     |
| OTU651 | Up | p__Verrucomicrobia; c__Verrucomicrobiae; o__Verrucomicrobiales; f__Verrucomicrobiaceae; g__Akkermansia; s__unclassified_g__Akkermansia | f__Verrucomicrobiaceae |



**Table S2B. Discriminatory KEGG pathways between SCZ microbiota and HC microbiota recipient mice.**

| ID      | Relative Abundance in ‘SCZ microbiota’ recipient mice |                | Relative Abundance in ‘HC microbiota’ recipient mice |                | Pathways                                            | p-value | SCZ Relative to HCs |
|---------|-------------------------------------------------------|----------------|------------------------------------------------------|----------------|-----------------------------------------------------|---------|---------------------|
|         | Mean                                                  | Std. Deviation | Mean                                                 | Std. Deviation |                                                     |         |                     |
| ko00564 | 220399.72                                             | 7284.57        | 200166.22                                            | 5447.65        | Glycerophospholipid metabolism                      | <0.001  | Up                  |
| ko00561 | 170929.70                                             | 13250.00       | 185647.36                                            | 8305.54        | Glycerolipid metabolism                             | 0.008   | Down                |
| ko00563 | 7382.06                                               | 441.30         | 6861.41                                              | 191.09         | Glycosylphosphatidylinositol-anchor biosynthesis    | 0.004   | Up                  |
| ko00604 | 92824.21                                              | 13225.25       | 111411.33                                            | 17201.08       | Glycosphingolipid biosynthesis - ganglio series     | 0.007   | Down                |
| ko00603 | 147101.95                                             | 16954.69       | 185335.03                                            | 30526.68       | Glycosphingolipid biosynthesis - globo series       | <0.001  | Down                |
| ko04071 | 12543.24                                              | 743.87         | 10600.41                                             | 572.81         | Sphingolipid signaling pathway                      | <0.001  | Up                  |
| ko00600 | 342791.14                                             | 26563.22       | 435281.56                                            | 56818.85       | Sphingolipid metabolism                             | <0.001  | Down                |
| ko00640 | 329542.18                                             | 7767.56        | 312127.54                                            | 6625.26        | Propanoate metabolism                               | <0.001  | Up                  |
| ko00592 | 9420.77                                               | 474.36         | 7604.62                                              | 628.47         | alpha-Linolenic acid metabolism                     | <0.001  | Up                  |
| ko00590 | 8083.28                                               | 778.74         | 10926.75                                             | 695.72         | Arachidonic acid metabolism                         | <0.001  | Down                |
| ko01040 | 61474.97                                              | 1934.08        | 57080.00                                             | 3034.58        | Biosynthesis of unsaturated fatty acids             | 0.001   | Up                  |
| ko00970 | 712524.00                                             | 11758.88       | 694819.87                                            | 7467.11        | Aminoacyl-tRNA biosynthesis                         | 0.003   | Up                  |
| ko01230 | 2080022.55                                            | 34503.69       | 1962968.41                                           | 16114.75       | Biosynthesis of amino acids                         | <0.001  | Up                  |
| ko00260 | 513174.46                                             | 7577.37        | 502186.82                                            | 3684.24        | Glycine, serine and threonine metabolism            | 0.003   | Up                  |
| ko00473 | 57038.11                                              | 862.00         | 54435.74                                             | 1039.97        | D-Alanine metabolism                                | <0.001  | Up                  |
| ko00300 | 273702.70                                             | 7146.57        | 254641.44                                            | 4048.78        | Lysine biosynthesis                                 | <0.001  | Up                  |
| ko00290 | 245337.70                                             | 11741.55       | 223767.26                                            | 5693.26        | Valine, leucine and isoleucine biosynthesis         | <0.001  | Up                  |
| ko00400 | 304598.09                                             | 4849.41        | 294549.61                                            | 3474.69        | Phenylalanine, tyrosine and tryptophan biosynthesis | <0.001  | Up                  |
| ko00270 | 478365.49                                             | 9230.89        | 458132.12                                            | 6348.86        | Cysteine and methionine metabolism                  | <0.001  | Up                  |
| ko04973 | 15360.08                                              | 938.70         | 20765.37                                             | 2065.06        | Carbohydrate digestion and absorption               | <0.001  | Down                |

|         |            |          |            |          |                                                      |        |      |
|---------|------------|----------|------------|----------|------------------------------------------------------|--------|------|
| ko01200 | 1680912.20 | 19731.15 | 1612884.13 | 8962.38  | Carbon metabolism                                    | <0.001 | Up   |
| ko00620 | 686439.86  | 12873.43 | 653416.97  | 5426.69  | Pyruvate metabolism                                  | <0.001 | Up   |
| ko00010 | 595850.51  | 16902.40 | 577452.12  | 12723.27 | Glycolysis / Gluconeogenesis                         | 0.025  | Up   |
| ko00533 | 711.81     | 190.72   | 369.63     | 92.14    | Glycosaminoglycan biosynthesis - keratan sulfate     | <0.001 | Up   |
| ko00532 | 962.08     | 143.87   | 647.39     | 84.36    | Glycosaminoglycan biosynthesis - chondroitin sulfate | <0.001 | Down |
| ko00534 | 1396.86    | 63.17    | 1621.45    | 144.78   | Glycosaminoglycan biosynthesis - heparan sulfate     | <0.001 | Down |
| ko00730 | 176996.24  | 4692.57  | 163795.89  | 5826.54  | Thiamine metabolism                                  | <0.001 | Up   |
| ko00230 | 1260655.76 | 15866.35 | 1220764.51 | 20427.46 | Purine metabolism                                    | <0.001 | Up   |
| ko00240 | 989324.92  | 14125.23 | 961965.92  | 21673.52 | Pyrimidine metabolism                                | 0.009  | Up   |
| ko00650 | 269911.08  | 13424.28 | 248023.42  | 4405.37  | Butanoate metabolism                                 | <0.001 | Up   |
| ko00630 | 542469.62  | 7986.26  | 523413.64  | 8051.18  | Glyoxylate and dicarboxylate metabolism              | <0.001 | Up   |
| ko00440 | 47717.46   | 2828.06  | 29336.36   | 1843.18  | Phosphonate and phosphinate metabolism               | <0.001 | Up   |
| ko00680 | 428098.59  | 7692.01  | 404834.85  | 10221.88 | Methane metabolism                                   | <0.001 | Up   |

**Table S3A. Differential fecal metabolites between SCZ microbiota and HC microbiota recipient mice.**

| Platform | Metabolites                                   | Relative Abundance in ‘SCZ microbiota’ recipient mice |          | Relative Abundance in ‘HC microbiota’ recipient mice |         | SCZ/CON | KEGG pathway          |
|----------|-----------------------------------------------|-------------------------------------------------------|----------|------------------------------------------------------|---------|---------|-----------------------|
|          |                                               |                                                       |          |                                                      |         |         |                       |
| LC       | PE(22:4(7Z,10Z,13Z,16Z)/20:4(5Z,8Z,11Z,14Z))  | 1132.21                                               | 495.28   | 301.61                                               | 177.26  | Up      | Lipids metabolism     |
| LC       | PE(22:6(4Z,7Z,10Z,13Z,16Z,19Z)/20:2(11Z,14Z)) | 402.43                                                | 159.71   | 74.18                                                | 61.72   | Up      | Lipids metabolism     |
| LC       | PC(22:6(4Z,7Z,10Z,13Z,16Z,19Z)/18:2(9Z,12Z))  | 3739.94                                               | 1799.172 | 1440.87                                              | 630.28  | Up      | Lipids metabolism     |
| LC       | LysoPC(P-18:0)                                | 941.64                                                | 130.96   | 243.99                                               | 84.74   | Up      | Lipids metabolism     |
| LC       | LysoPC(22:4(7Z,10Z,13Z,16Z))                  | 440.46                                                | 122.44   | 32.44                                                | 60.86   | Up      | Lipids metabolism     |
| LC       | LysoPC(P-18:1(9Z))                            | 480.86                                                | 258.64   | 10.70                                                | 28.99   | Up      | Lipids metabolism     |
| LC       | LysoPE(22:0/0:0)                              | 486.21                                                | 116.85   | 141.17                                               | 25.71   | Up      | Lipids metabolism     |
| LC       | DG(18:2n6/0:0/20:4n3)                         | 5616.97                                               | 2164.84  | 2563.66                                              | 714.76  | Up      | Lipids metabolism     |
| LC       | DG(18:2n6/0:0/20:4n6)                         | 3527.33                                               | 1203.07  | 1458.31                                              | 520.27  | Up      | Lipids metabolism     |
| GC       | glycerol                                      | 372.40                                                | 217.69   | 56.46                                                | 88.11   | Up      | Lipids metabolism     |
| NMR      | Glutamine                                     | 0.0805                                                | 0.00315  | 0.0890                                               | 0.00252 | Down    | Amino acid metabolism |
| NMR      | Glutamate                                     | 1.4775                                                | 0.06283  | 1.5359                                               | 0.08078 | Down    | Amino acid metabolism |
| NMR      | Isobutyrate                                   | 0.0491                                                | 0.00484  | 0.0499                                               | 0.00570 | Down    | Amino acid metabolism |
| NMR      | Aspartate                                     | 0.0670                                                | 0.00216  | 0.0611                                               | 0.00291 | Up      | Amino acid metabolism |
| NMR      | Histidine                                     | 0.0077                                                | 0.00102  | 0.0068                                               | 0.00068 | Up      | Amino acid metabolism |
| GC       | glycine                                       | 42.34                                                 | 14.89    | 29.15                                                | 7.31    | Up      | Amino acid metabolism |
| NMR      | Leucine                                       | 1.8411                                                | 0.12622  | 1.1464                                               | 0.12283 | Up      | Amino acid metabolism |
| GC       | D-alanyl-D-alanine                            | 28.95                                                 | 10.54    | 16.38                                                | 7.65    | Up      | Amino acid metabolism |

|     |                                        |         |         |         |         |      |                       |
|-----|----------------------------------------|---------|---------|---------|---------|------|-----------------------|
| GC  | alanine                                | 201.79  | 92.95   | 101.66  | 31.02   | Up   | Amino acid metabolism |
| LC  | N-Undecanoylglycine                    | 753.54  | 379.85  | 311.44  | 119.76  | Up   | Amino acid metabolism |
| GC  | serine                                 | 55.34   | 26.15   | 22.35   | 7.77    | Up   | Amino acid metabolism |
| GC  | valine                                 | 74.16   | 35.82   | 26.86   | 10.16   | Up   | Amino acid metabolism |
| GC  | ornithine                              | 70.41   | 25.37   | 23.09   | 23.01   | Up   | Amino acid metabolism |
| GC  | phenylalanine                          | 38.09   | 14.44   | 12.41   | 7.77    | Up   | Amino acid metabolism |
| GC  | tyrosine                               | 175.51  | 96.66   | 53.41   | 38.79   | Up   | Amino acid metabolism |
| GC  | asparagine                             | 17.13   | 4.83    | 5.12    | 6.25    | Up   | Amino acid metabolism |
| GC  | Isoleucine                             | 48.28   | 23.87   | 13.38   | 8.05    | Up   | Amino acid metabolism |
| GC  | lysine                                 | 513.52  | 243.71  | 137.76  | 190.34  | Up   | Amino acid metabolism |
| LC  | L-Arginine                             | 957.02  | 151.88  | 217.49  | 117.29  | Up   | Amino acid metabolism |
| LC  | N-Arachidonoyl glycine                 | 1131.20 | 227.15  | 196.20  | 121.86  | Up   | Amino acid metabolism |
| LC  | Tetrahydrodeoxycorticosterone          | 1.81    | 2.22    | 530.15  | 421.22  | Down | Others                |
| LC  | 17-HDoHE                               | 2.47    | 3.84    | 500.50  | 442.63  | Down | Others                |
| LC  | D-4'-Phosphopantothenate               | 46.63   | 126.00  | 1022.42 | 944.51  | Down | Others                |
| LC  | 6-Hydroxypentadecanedioic acid         | 63.88   | 21.02   | 981.60  | 626.88  | Down | Others                |
| LC  | 15beta-Hydroxydesogestrel              | 37.45   | 14.37   | 512.78  | 459.85  | Down | Others                |
| LC  | 2-Hydroxyenterodiol                    | 361.58  | 137.81  | 1212.12 | 411.32  | Down | Others                |
| LC  | 4-O-beta-D-Glucopyranuronosyl-L-fucose | 406.99  | 112.31  | 1184.30 | 463.46  | Down | Others                |
| LC  | 1,11-Undecanedicarboxylic acid         | 74.13   | 54.00   | 395.53  | 156.93  | Down | Others                |
| LC  | 8-Hydroxyoctanoate                     | 339.38  | 115.85  | 703.28  | 202.32  | Down | Others                |
| NMR | Uracil                                 | 0.0106  | 0.00512 | 0.0200  | 0.00673 | Down | Others                |
| GC  | Galactinol                             | 932.84  | 418.18  | 1684.60 | 324.59  | Down | Others                |
| GC  | beta-Mannosylglycerate                 | 437.75  | 207.93  | 676.28  | 245.14  | Down | Others                |

|     |                        |        |         |        |         |      |        |
|-----|------------------------|--------|---------|--------|---------|------|--------|
| GC  | Glucose-1-phosphate    | 56.20  | 19.07   | 81.71  | 23.31   | Down | Others |
| NMR | $\alpha$ -Glucose      | 0.1501 | 0.01558 | 0.2146 | 0.04182 | Down | Others |
| NMR | Inosine                | 0.0200 | 0.00532 | 0.0283 | 0.00603 | Down | Others |
| NMR | Formate                | 0.0042 | 0.00398 | 0.0059 | 0.00415 | Down | Others |
| NMR | Nicotinate             | 0.0082 | 0.00237 | 0.0115 | 0.00290 | Down | Others |
| GC  | D-(glycerol-phosphate) | 48.89  | 16.03   | 66.12  | 12.89   | Down | Others |
| NMR | Adenosine              | 0.0200 | 0.00452 | 0.0263 | 0.00557 | Down | Others |
| NMR | Acetate                | 4.4102 | 0.49249 | 5.4129 | 1.07281 | Down | Others |
| NMR | Fumarate               | 0.0016 | 0.00088 | 0.0019 | 0.00054 | Down | Others |
| NMR | $\beta$ -Glucose       | 0.1991 | 0.01736 | 0.2352 | 0.03904 | Down | Others |
| NMR | Allantoin              | 0.1189 | 0.01702 | 0.1337 | 0.02890 | Down | Others |
| NMR | myo-Inositol           | 0.1391 | 0.00421 | 0.1562 | 0.00638 | Down | Others |
| NMR | Butyrate               | 1.9641 | 0.04489 | 2.1785 | 0.15440 | Down | Others |
| NMR | Dimethylglycine        | 0.0635 | 0.00356 | 0.0689 | 0.00938 | Down | Others |
| NMR | Choline                | 0.0919 | 0.00377 | 0.0992 | 0.00451 | Down | Others |
| NMR | Betaine                | 0.2224 | 0.02562 | 0.2361 | 0.01328 | Down | Others |
| NMR | Malate                 | 0.0932 | 0.00400 | 0.0979 | 0.00493 | Down | Others |
| NMR | $\alpha$ -Ketobutyrate | 1.7544 | 0.20400 | 1.8290 | 0.31877 | Down | Others |
| NMR | Trimethylamine         | 0.0567 | 0.00123 | 0.0590 | 0.00297 | Down | Others |
| NMR | Malonate               | 0.0761 | 0.00262 | 0.0789 | 0.00260 | Down | Others |
| NMR | $\beta$ -Galactose     | 0.0503 | 0.00297 | 0.0519 | 0.00258 | Down | Others |
| NMR | Glycolic acid          | 0.1126 | 0.00539 | 0.1156 | 0.00570 | Down | Others |
| NMR | Pyroglutamate          | 0.0741 | 0.00296 | 0.0750 | 0.00303 | Down | Others |
| NMR | Acetoacetate           | 0.6924 | 0.04863 | 0.6976 | 0.04746 | Down | Others |
| NMR | Dimethylamine          | 0.0667 | 0.00309 | 0.0654 | 0.00628 | Up   | Others |

|     |                                                 |          |         |          |         |    |        |
|-----|-------------------------------------------------|----------|---------|----------|---------|----|--------|
| NMR | Bile acid                                       | 0.0318   | 0.00769 | 0.0305   | 0.00548 | Up | Others |
| NMR | 3-Methylxanthine                                | 0.0035   | 0.00083 | 0.0033   | 0.00066 | Up | Others |
| NMR | 3-Hydroxybutyrate                               | 0.6800   | 0.03344 | 0.6379   | 0.05421 | Up | Others |
| NMR | Methylamine                                     | 0.0706   | 0.00337 | 0.0660   | 0.00329 | Up | Others |
| NMR | Succinate                                       | 0.9199   | 0.34322 | 0.8499   | 0.18471 | Up | Others |
| NMR | Uridine                                         | 0.0069   | 0.00062 | 0.0064   | 0.00067 | Up | Others |
| NMR | Formylglycine                                   | 0.0037   | 0.00106 | 0.0033   | 0.00080 | Up | Others |
| NMR | Aminohippurate                                  | 0.0291   | 0.00184 | 0.0239   | 0.00157 | Up | Others |
| NMR | 1-Methylhistidine                               | 0.0869   | 0.02668 | 0.0610   | 0.01911 | Up | Others |
| GC  | Ethanolamine                                    | 44.25    | 17.17   | 27.23    | 12.69   | Up | Others |
| LC  | N1-Acetylspermidine                             | 1001.41  | 542.78  | 492.52   | 120.58  | Up | Others |
| LC  | 3-Hydroxyhexadecanoylcarnitine                  | 1261.88  | 506.61  | 620.49   | 441.15  | Up | Others |
| LC  | 1- Heptadecanoylglycerophosphoethanolamine      | 25325.69 | 6246.94 | 12271.03 | 2782.24 | Up | Others |
| LC  | 12-Keto-tetrahydro-leukotriene B4               | 1092.96  | 401.80  | 505.12   | 148.09  | Up | Others |
| LC  | (4-Hydroxybenzoyl)choline                       | 3630.60  | 828.29  | 1591.97  | 735.41  | Up | Others |
| LC  | 3-Polyprenyl-4,5-dihydroxybenzoate              | 1188.53  | 244.23  | 500.77   | 93.70   | Up | Others |
| LC  | Pregnanetriol                                   | 853.44   | 83.09   | 357.86   | 55.93   | Up | Others |
| LC  | 3a,7a-Dihydroxycoprostanic acid                 | 856.26   | 108.10  | 355.12   | 90.54   | Up | Others |
| LC  | Brevifolincarboxylic acid 9-sulfate             | 1198.63  | 393.95  | 493.13   | 562.93  | Up | Others |
| LC  | Glycocholic acid                                | 1749.86  | 227.59  | 715.68   | 157.20  | Up | Others |
| LC  | 2-Oleoylglycerophosphocholine                   | 1867.56  | 925.05  | 747.63   | 111.89  | Up | Others |
| LC  | 2-Phenylacetamide                               | 754.82   | 297.14  | 286.83   | 78.13   | Up | Others |
| LC  | 11beta,20-Dihydroxy-3-oxopregn-4-en-21-oic acid | 944.38   | 172.29  | 357.34   | 72.93   | Up | Others |

|    |                                    |         |         |         |        |    |        |
|----|------------------------------------|---------|---------|---------|--------|----|--------|
| LC | Vitamin A2 aldehyde                | 4145.90 | 1558.51 | 1544.94 | 562.05 | Up | Others |
| LC | Estrone                            | 889.14  | 141.00  | 324.04  | 55.37  | Up | Others |
| GC | Methyl-beta-D-galactopyranoside    | 17.04   | 4.16    | 6.20    | 5.17   | Up | Others |
| LC | 5-Methoxydimethyltryptamine        | 630.36  | 129.21  | 209.86  | 61.20  | Up | Others |
| LC | Leukotriene E4                     | 1600.59 | 673.86  | 494.13  | 42.26  | Up | Others |
| LC | Lithocholytaurine                  | 683.12  | 127.13  | 225.64  | 62.87  | Up | Others |
| GC | citrulline                         | 15.09   | 3.66    | 4.97    | 3.63   | Up | Others |
| LC | p-Hydroxynonanophenone             | 1603.98 | 880.43  | 499.69  | 92.15  | Up | Others |
| LC | Vitamin A2                         | 4409.21 | 1701.09 | 1307.92 | 835.82 | Up | Others |
| LC | Adrenosterone                      | 1179.60 | 243.80  | 340.40  | 55.00  | Up | Others |
| LC | 13'-Hydroxy-alpha-tocotrienol      | 1904.29 | 1061.42 | 539.34  | 323.05 | Up | Others |
| LC | 3-Oxotetradecanoic acid glycerides | 753.45  | 187.21  | 206.31  | 71.01  | Up | Others |
| LC | Cortisone acetate                  | 1399.46 | 241.18  | 383.12  | 123.84 | Up | Others |
| LC | 6,8-Dihydroxypurine                | 605.98  | 139.77  | 161.48  | 55.36  | Up | Others |
| LC | 16a-Hydroxyestrone                 | 424.47  | 89.87   | 105.74  | 24.34  | Up | Others |
| LC | Deoxycholic acid 3-glucuronide     | 753.48  | 412.12  | 176.33  | 36.45  | Up | Others |
| LC | 2-Phenylethyl acetate              | 492.34  | 228.16  | 110.42  | 92.79  | Up | Others |
| LC | All-trans-hexaprenyl diphosphate   | 1103.81 | 157.49  | 246.16  | 127.28 | Up | Others |
| LC | Pyridoxamine                       | 975.50  | 185.57  | 210.93  | 79.63  | Up | Others |
| LC | 9'-Carboxy-gamma-tocotrienol       | 1436.41 | 306.63  | 308.78  | 166.10 | Up | Others |
| LC | Homocysteine thiolactone           | 501.84  | 87.11   | 105.30  | 72.67  | Up | Others |
| LC | S-Methyl benzenecarbothioate       | 892.16  | 160.32  | 186.91  | 80.71  | Up | Others |
| LC | 17a-Ethynylestradiol               | 559.97  | 162.05  | 111.22  | 48.52  | Up | Others |
| LC | 3-Oxododecanoic acid glycerides    | 728.95  | 212.87  | 144.61  | 74.20  | Up | Others |
| LC | 7-Hydroxyterpineol 8-glucoside     | 1487.84 | 411.03  | 268.49  | 99.55  | Up | Others |

|    |                                              |         |         |        |        |    |        |
|----|----------------------------------------------|---------|---------|--------|--------|----|--------|
| LC | 12a-Hydroxy-3-oxocholadienic acid            | 555.04  | 99.25   | 92.93  | 49.27  | Up | Others |
| LC | 3-Oxo-4,6-choladienoic acid                  | 631.38  | 155.03  | 90.31  | 127.24 | Up | Others |
| LC | gamma-Chaconine                              | 462.57  | 178.53  | 65.74  | 39.32  | Up | Others |
| LC | Tauroursocholic acid                         | 752.05  | 155.42  | 84.39  | 31.89  | Up | Others |
| LC | LysoPE(22:4(7Z,10Z,13Z,16Z)/0:0)             | 373.82  | 83.86   | 40.84  | 32.07  | Up | Others |
| LC | 2-Phenylethyl pentanoate                     | 1157.03 | 199.66  | 119.06 | 137.92 | Up | Others |
| LC | 2-trans,4-cis-Decadienoylcarnitine           | 1351.94 | 322.32  | 138.49 | 106.09 | Up | Others |
| LC | 19-Hydroxydeoxycorticosterone                | 856.24  | 239.69  | 78.82  | 64.17  | Up | Others |
| LC | 2-sulfamoylacetylphenol                      | 900.38  | 406.28  | 71.76  | 67.13  | Up | Others |
| LC | 11'-Carboxy-alpha-tocotrienol                | 483.69  | 135.62  | 36.28  | 43.14  | Up | Others |
| LC | 3,4-Dimethyl-5-pentyl-2-furanundecanoic acid | 875.39  | 181.24  | 56.60  | 58.65  | Up | Others |
| LC | Etamiphylline                                | 668.25  | 337.04  | 40.96  | 15.50  | Up | Others |
| LC | 11'-Carboxy-gamma-tocotrienol                | 430.56  | 104.05  | 24.65  | 33.92  | Up | Others |
| LC | 13'-Carboxy-gamma-tocotrienol                | 369.80  | 101.60  | 14.14  | 10.02  | Up | Others |
| LC | Chenodeoxyglycocholic acid                   | 732.16  | 99.09   | 25.87  | 37.47  | Up | Others |
| LC | 2-Heptenoic acid                             | 1548.97 | 1132.34 | 45.26  | 11.43  | Up | Others |
| LC | Cholesterol glucuronide                      | 1528.72 | 287.59  | 44.45  | 11.34  | Up | Others |
| LC | 2-hydroxydesipramine                         | 568.38  | 425.70  | 16.13  | 11.08  | Up | Others |
| LC | Octaprenyl diphosphate                       | 1287.30 | 435.12  | 33.19  | 68.02  | Up | Others |
| LC | 2-Hexaprenyl-6-methoxyphenol                 | 454.43  | 344.61  | 7.41   | 13.56  | Up | Others |
| LC | 12-oxo-20-dihydroxy-leukotriene B4           | 2174.83 | 538.37  | 33.71  | 52.29  | Up | Others |
| LC | 3a,21-Dihydroxy-5b-pregnane-11,20-dione      | 763.53  | 295.51  | 11.60  | 17.77  | Up | Others |
| LC | (S)-9-Hydroxy-10-undecenoic acid             | 386.86  | 179.80  | 5.39   | 9.41   | Up | Others |



|    |                                              |        |        |      |      |    |        |
|----|----------------------------------------------|--------|--------|------|------|----|--------|
| LC | 7a,12a-Dihydroxy-3-oxo-4-cholenoic acid      | 340.99 | 103.12 | 4.10 | 8.24 | Up | Others |
| LC | 3-Hexaprenyl-4-hydroxy-5-methoxybenzoic acid | 449.48 | 162.17 | 0.37 | 0.46 | Up | Others |

**Table S3B. Differential serum metabolites between SCZ microbiota and HC microbiota recipient mice.**

| Platform | Metabolites                       | Relative Abundance in ‘SCZ microbiota’ recipient mice |        | Relative Abundance in ‘HC microbiota’ recipient mice |        | SCZ/HC | KEGG pathway          |
|----------|-----------------------------------|-------------------------------------------------------|--------|------------------------------------------------------|--------|--------|-----------------------|
|          |                                   |                                                       |        |                                                      |        |        |                       |
| GC       | glutamine                         | 1.86                                                  | 0.50   | 1.21                                                 | 0.37   | Up     | Amino acid metabolism |
| GC       | alanine                           | 3.39                                                  | 1.20   | 2.32                                                 | 0.83   | Up     | Amino acid metabolism |
| GC       | asparagine                        | 1.51                                                  | 0.63   | 0.85                                                 | 0.17   | Up     | Amino acid metabolism |
| GC       | beta-Alanine                      | 3.39                                                  | 1.20   | 2.32                                                 | 0.83   | Up     | Amino acid metabolism |
| GC       | glycine                           | 1.08                                                  | 0.58   | 0.57                                                 | 0.13   | Up     | Amino acid metabolism |
| GC       | leucine                           | 1.41                                                  | 0.77   | 0.66                                                 | 0.49   | Up     | Amino acid metabolism |
| GC       | lysine                            | 6.87                                                  | 2.42   | 4.48                                                 | 1.27   | Up     | Amino acid metabolism |
| GC       | methionine                        | 3.20                                                  | 1.24   | 2.13                                                 | 0.50   | Up     | Amino acid metabolism |
| GC       | ornithine                         | 0.84                                                  | 0.34   | 0.45                                                 | 0.11   | Up     | Amino acid metabolism |
| GC       | phenylalanine                     | 3.24                                                  | 1.40   | 2.25                                                 | 0.49   | Up     | Amino acid metabolism |
| GC       | proline                           | 2.72                                                  | 0.72   | 1.97                                                 | 0.55   | Up     | Amino acid metabolism |
| LC       | S-Adenosylhomocysteine            | 3.13                                                  | 2.34   | 7.14                                                 | 3.43   | Down   | Amino acid metabolism |
| GC       | serine                            | 1.56                                                  | 0.50   | 1.09                                                 | 0.28   | Up     | Amino acid metabolism |
| GC       | threonine                         | 1.27                                                  | 0.48   | 0.86                                                 | 0.21   | Up     | Amino acid metabolism |
| LC       | PE(18:2(9Z,12Z)/24:1(15Z))        | 27.15                                                 | 46.60  | 195.54                                               | 134.53 | Down   | Lipids metabolism     |
| LC       | PE(20:0/P-18:1(11Z))              | 362.03                                                | 145.41 | 785.31                                               | 301.29 | Down   | Lipids metabolism     |
| LC       | PE(22:0/16:1(9Z))                 | 290.19                                                | 76.54  | 496.56                                               | 144.74 | Down   | Lipids metabolism     |
| LC       | PE(22:1(13Z)/P-18:1(11Z))         | 81.81                                                 | 46.06  | 253.89                                               | 133.60 | Down   | Lipids metabolism     |
| LC       | PE(22:2(13Z,16Z)/P-18:0)          | 4.73                                                  | 8.02   | 50.80                                                | 39.17  | Down   | Lipids metabolism     |
| LC       | PE(22:5(7Z,10Z,13Z,16Z,19Z)/18:0) | 6.70                                                  | 7.59   | 18.48                                                | 6.13   | Down   | Lipids metabolism     |
| LC       | PE(P-16:0e/16:0)                  | 8.65                                                  | 10.42  | 57.53                                                | 47.82  | Down   | Lipids metabolism     |

|    |                                                         |        |        |         |        |      |                   |
|----|---------------------------------------------------------|--------|--------|---------|--------|------|-------------------|
| LC | PE(P-18:1(9Z)/20:0)                                     | 286.55 | 86.27  | 513.65  | 161.61 | Down | Lipids metabolism |
| LC | PE(P-18:1(9Z)/22:2(13Z,16Z))                            | 38.66  | 19.92  | 105.41  | 47.06  | Down | Lipids metabolism |
| LC | PC(18:2(9Z,12Z)/16:1(9Z))                               | 333.18 | 268.50 | 1070.72 | 425.36 | Down | Lipids metabolism |
| LC | PC(18:2(9Z,12Z)/18:3(6Z,9Z,12Z))                        | 5.26   | 5.42   | 28.50   | 15.45  | Down | Lipids metabolism |
| LC | PC(20:1(11Z)/22:6(4Z,7Z,10Z,13Z,16Z,19Z))               | 113.17 | 31.65  | 204.09  | 66.51  | Down | Lipids metabolism |
| LC | PC(20:3(8Z,11Z,14Z)/22:6(4Z,7Z,10Z,13Z,16Z,19Z))        | 10.12  | 10.61  | 28.53   | 14.69  | Down | Lipids metabolism |
| LC | PC(20:4(8Z,11Z,14Z,17Z)/20:4(5Z,8Z,11Z,14Z))            | 9.78   | 11.55  | 78.06   | 30.39  | Down | Lipids metabolism |
| LC | PC(20:5(5Z,8Z,11Z,14Z,17Z)/P-18:1(11Z))                 | 90.59  | 72.31  | 265.73  | 133.17 | Down | Lipids metabolism |
| LC | PC(22:2(13Z,16Z)/16:1(9Z))                              | 48.97  | 31.65  | 203.24  | 106.79 | Down | Lipids metabolism |
| LC | PC(22:4(7Z,10Z,13Z,16Z)/16:0)                           | 90.40  | 41.22  | 216.79  | 86.55  | Down | Lipids metabolism |
| LC | PC(22:5(4Z,7Z,10Z,13Z,16Z)/16:1(9Z))                    | 93.76  | 101.31 | 576.60  | 362.69 | Down | Lipids metabolism |
| LC | PC(22:5(4Z,7Z,10Z,13Z,16Z)/22:6(4Z,7Z,10Z,13Z,16Z,19Z)) | 7.77   | 9.83   | 20.05   | 8.24   | Down | Lipids metabolism |
| LC | PC(22:5(7Z,10Z,13Z,16Z,19Z)/16:0)                       | 20.25  | 24.06  | 104.44  | 62.49  | Down | Lipids metabolism |
| LC | PC(22:5(7Z,10Z,13Z,16Z,19Z)/18:0)                       | 4.79   | 6.35   | 67.77   | 48.07  | Down | Lipids metabolism |
| LC | PC(22:5(7Z,10Z,13Z,16Z,19Z)/P-18:1(11Z))                | 39.08  | 35.37  | 275.23  | 166.58 | Down | Lipids metabolism |
| LC | PC(22:5(7Z,10Z,13Z,16Z,19Z)/P-18:1(9Z))                 | 63.24  | 73.56  | 484.64  | 319.85 | Down | Lipids metabolism |
| LC | PC(22:6(4Z,7Z,10Z,13Z,16Z,19Z)/16:0)                    | 17.59  | 18.17  | 65.62   | 34.15  | Down | Lipids metabolism |
| LC | PC(22:6(4Z,7Z,10Z,13Z,16Z,19Z)/18:1(9Z))                | 77.25  | 38.63  | 307.35  | 149.27 | Down | Lipids metabolism |

|    |                                                      |        |        |         |        |      |                   |
|----|------------------------------------------------------|--------|--------|---------|--------|------|-------------------|
| LC | PC(MonoMe(9,5)/MonoMe(9,5))                          | 17.99  | 9.34   | 8.66    | 2.99   | Up   | Lipids metabolism |
| LC | PC(o-18:0/20:4(8Z,11Z,14Z,17Z))                      | 17.39  | 21.39  | 92.05   | 56.64  | Down | Lipids metabolism |
| LC | PC(P-18:0/22:4(7Z,10Z,13Z,16Z))                      | 9.38   | 16.30  | 107.54  | 84.98  | Down | Lipids metabolism |
| LC | PC(P-18:0/22:5(7Z,10Z,13Z,16Z,19Z))                  | 52.93  | 56.66  | 244.40  | 128.50 | Down | Lipids metabolism |
| LC | PC(P-18:1(11Z)/20:1(11Z))                            | 144.58 | 173.02 | 796.16  | 477.29 | Down | Lipids metabolism |
| LC | PC(P-18:1(11Z)/20:3(8Z,11Z,14Z))                     | 9.97   | 11.58  | 57.53   | 30.47  | Down | Lipids metabolism |
| LC | PC(P-18:1(11Z)/20:5(5Z,8Z,11Z,14Z,17Z))              | 27.69  | 31.34  | 177.01  | 110.91 | Down | Lipids metabolism |
| LC | PC(P-18:1(9Z)/20:4(5Z,8Z,11Z,14Z))                   | 21.59  | 33.43  | 206.43  | 150.36 | Down | Lipids metabolism |
| LC | PC(P-18:1(9Z)/20:4(8Z,11Z,14Z,17Z))                  | 4.81   | 7.74   | 50.35   | 36.71  | Down | Lipids metabolism |
| LC | PS(14:0/14:1(9Z))                                    | 49.81  | 31.53  | 211.14  | 138.07 | Down | Lipids metabolism |
| LC | PS(14:1(9Z)/14:1(9Z))                                | 2.66   | 4.38   | 20.20   | 15.25  | Down | Lipids metabolism |
| LC | PS(18:0/18:2(9Z,12Z))                                | 12.12  | 12.46  | 76.17   | 55.06  | Down | Lipids metabolism |
| LC | PS(18:0/20:3(8Z,11Z,14Z))                            | 66.79  | 78.93  | 429.80  | 334.31 | Down | Lipids metabolism |
| LC | PS(18:0/22:5(7Z,10Z,13Z,16Z,19Z))                    | 531.31 | 165.52 | 1026.63 | 326.66 | Down | Lipids metabolism |
| LC | PS(18:1(9Z)/18:0)                                    | 155.05 | 136.50 | 702.62  | 504.88 | Down | Lipids metabolism |
| LC | PS(22:6(4Z,7Z,10Z,13Z,16Z,19Z)/18:1(9Z))             | 21.17  | 15.29  | 40.20   | 10.26  | Down | Lipids metabolism |
| LC | PI(20:4(5Z,8Z,11Z,14Z)/16:0)                         | 229.60 | 135.12 | 844.26  | 583.20 | Down | Lipids metabolism |
| LC | PI(22:6(4Z,7Z,10Z,13Z,16Z,19Z)/18:0)                 | 15.08  | 14.97  | 47.89   | 25.32  | Down | Lipids metabolism |
| LC | DG(15:0/22:0/0:0)                                    | 70.16  | 75.26  | 158.06  | 28.70  | Down | Lipids metabolism |
| LC | DG(22:4(7Z,10Z,13Z,16Z)/22:5(4Z,7Z,10Z,13Z,16Z)/0:0) | 54.80  | 76.12  | 167.50  | 76.33  | Down | Lipids metabolism |
| LC | Glucosylceramide (d18:1/16:0)                        | 3.83   | 2.51   | 6.59    | 1.40   | Down | Lipids metabolism |
| LC | Glycerol tripropanoate                               | 9.00   | 6.09   | 3.07    | 2.14   | Up   | Lipids metabolism |

|    |                                        |         |         |         |         |      |                   |
|----|----------------------------------------|---------|---------|---------|---------|------|-------------------|
| LC | LysoPC(24:0)                           | 2.77    | 3.90    | 34.30   | 31.37   | Down | Lipids metabolism |
| LC | lysoPC(26:0)                           | 28.80   | 26.33   | 142.11  | 96.10   | Down | Lipids metabolism |
| LC | PGP(18:1(9Z)/22:5(7Z,10Z,13Z,16Z,19Z)) | 40.28   | 12.72   | 26.38   | 6.49    | Up   | Lipids metabolism |
| LC | TG(15:0/14:1(9Z)/18:4(6Z,9Z,12Z,15Z))  | 123.44  | 39.75   | 196.24  | 45.40   | Down | Lipids metabolism |
| LC | 12-hydroxyheptadecanoic acid           | 36.79   | 17.42   | 55.42   | 8.06    | Down | Others            |
| LC | 12-Hydroxystearic acid                 | 5.27    | 3.85    | 12.62   | 5.63    | Down | Others            |
| LC | 13'-Hydroxy-gamma-tocotrienol          | 2.91    | 2.83    | 7.56    | 3.58    | Down | Others            |
| GC | 1-Methylhydantoin                      | 21.22   | 5.81    | 15.01   | 3.57    | Up   | Others            |
| LC | 1-O-Sinapoylglucose                    | 3.38    | 2.73    | 6.75    | 1.99    | Down | Others            |
| LC | 1-Phenyl-1,3-heptadecanedione          | 333.16  | 284.30  | 768.45  | 143.43  | Down | Others            |
| LC | 1-Stearoylglycerophosphoserine         | 38.74   | 12.26   | 60.05   | 14.20   | Down | Others            |
| LC | 25-Hydroxyvitamin D3-26,23-lactone     | 24.19   | 18.49   | 125.00  | 85.51   | Down | Others            |
| GC | 2-Amino-2-norbornanecarboxylic acid    | 0.01    | 0.01    | 0.03    | 0.01    | Down | Others            |
| GC | 2-hydroxypyridine                      | 0.17    | 0.03    | 0.13    | 0.04    | Up   | Others            |
| LC | 2-Polyprenyl-6-methoxyphenol           | 313.87  | 170.76  | 126.80  | 57.99   | Up   | Others            |
| LC | 2-Undecenal                            | 2.77    | 2.83    | 7.08    | 3.06    | Down | Others            |
| LC | 3, 5-Tetradecadiencarnitine            | 328.40  | 263.66  | 592.67  | 100.85  | Down | Others            |
| LC | 3a,6b,7b-Trihydroxy-5b-cholanoic acid  | 237.80  | 206.78  | 732.07  | 196.67  | Down | Others            |
| LC | 3b-Hydroxy-5-cholenoic acid            | 2505.72 | 1968.91 | 6232.45 | 1327.79 | Down | Others            |
| LC | 3-Furanmethanol glucoside              | 43.63   | 26.85   | 79.22   | 14.79   | Down | Others            |
| LC | 3-hydroxyhexadecanoic acid             | 3.93    | 2.74    | 6.82    | 1.59    | Down | Others            |
| LC | 3-hydroxynonanoyl carnitine            | 35.08   | 13.53   | 21.68   | 5.60    | Up   | Others            |
| LC | 3-hydroxyundecanoyl carnitine          | 23.60   | 11.65   | 11.84   | 4.57    | Up   | Others            |
| LC | 3-Methyluridine                        | 1.22    | 1.12    | 2.84    | 1.35    | Down | Others            |

|    |                                                              |        |        |        |        |      |        |
|----|--------------------------------------------------------------|--------|--------|--------|--------|------|--------|
| LC | 4,6-Nonadecanedione                                          | 25.82  | 11.66  | 39.64  | 6.10   | Down | Others |
| LC | 4-Hydroxybenzaldehyde                                        | 0.87   | 0.82   | 2.37   | 0.86   | Down | Others |
| LC | 4-Hydroxydiphenylamine                                       | 4.52   | 2.62   | 7.99   | 1.86   | Down | Others |
| LC | 4-Hydroxytamoxifen-N-glucuronide                             | 2.48   | 1.91   | 0.63   | 0.50   | Up   | Others |
| LC | 5,6-Dihydroxyprostaglandin F1a                               | 1.59   | 2.11   | 5.31   | 2.47   | Down | Others |
| GC | 5-Aminovaleric acid                                          | 0.45   | 0.24   | 0.20   | 0.10   | Up   | Others |
| LC | 5-Hydroxy-7-(4-hydroxy-3-methoxyphenyl)-1-phenyl-3-heptanone | 2.56   | 2.08   | 6.46   | 2.02   | Down | Others |
| LC | 6-Deoxohomodolichosterone                                    | 3.39   | 5.66   | 12.13  | 5.36   | Down | Others |
| LC | 7-Dehydrodesmosterol                                         | 7.62   | 10.40  | 32.67  | 16.66  | Down | Others |
| LC | 7-Ketocholesterol                                            | 137.67 | 121.80 | 483.47 | 220.54 | Down | Others |
| LC | 9,10-Epoxyoctadecenoic acid                                  | 0.94   | 1.36   | 13.51  | 6.80   | Down | Others |
| LC | 9-Oxo-octadecanoic acid                                      | 2.54   | 4.41   | 9.61   | 5.97   | Down | Others |
| GC | Adipamide                                                    | 0.29   | 0.16   | 0.15   | 0.09   | Up   | Others |
| LC | alpha-Tocopherolquinone                                      | 7.74   | 1.36   | 5.07   | 2.06   | Up   | Others |
| GC | ascorbate                                                    | 0.21   | 0.16   | 0.07   | 0.06   | Up   | Others |
| GC | Benzyl thiocyanate                                           | 1.31   | 0.49   | 0.78   | 0.37   | Up   | Others |
| GC | beta-Mannosylglycerate                                       | 9.66   | 2.65   | 7.28   | 1.29   | Up   | Others |
| LC | Bis-gamma-glutamylcysteinylbis-beta-alanine                  | 40.47  | 33.40  | 4.05   | 5.24   | Up   | Others |
| LC | CerP(d18:1/16:0)                                             | 12.34  | 10.37  | 41.54  | 21.26  | Down | Others |
| LC | Cholesta-4,6-dien-3-one                                      | 16.35  | 23.82  | 77.26  | 47.01  | Down | Others |
| LC | Cholesteryl acetate                                          | 516.06 | 177.26 | 830.03 | 241.66 | Down | Others |
| GC | creatine degr                                                | 0.40   | 0.16   | 0.26   | 0.05   | Up   | Others |
| GC | Cumic Acid                                                   | 1.25   | 0.43   | 0.88   | 0.33   | Up   | Others |

|    |                                                 |        |       |        |       |      |        |
|----|-------------------------------------------------|--------|-------|--------|-------|------|--------|
| GC | D-erythro-sphingosine                           | 0.53   | 0.09  | 0.44   | 0.08  | Up   | Others |
| GC | Dioctyl phthalate                               | 0.39   | 0.12  | 0.28   | 0.04  | Up   | Others |
| LC | Dodecanoylcarnitine                             | 61.32  | 63.92 | 179.22 | 64.00 | Down | Others |
| GC | D-Talose                                        | 0.25   | 0.09  | 0.17   | 0.07  | Up   | Others |
| LC | Egonol glucoside                                | 58.34  | 32.90 | 91.44  | 12.55 | Down | Others |
| GC | Erythrose                                       | 0.22   | 0.07  | 0.15   | 0.05  | Up   | Others |
| GC | fumaric acid                                    | 0.46   | 0.19  | 0.24   | 0.06  | Up   | Others |
| GC | Galactonic acid                                 | 0.24   | 0.06  | 0.19   | 0.03  | Up   | Others |
| LC | gamma-Glutamyl-S-(1-propenyl)cysteine sulfoxide | 0.70   | 0.65  | 1.67   | 0.57  | Down | Others |
| LC | Heptadecanoic acid                              | 9.11   | 5.77  | 15.15  | 2.39  | Down | Others |
| LC | Homoanserine                                    | 1.64   | 1.67  | 3.95   | 1.43  | Down | Others |
| LC | L-2-Amino-3-methylenehexanoic acid              | 183.33 | 33.05 | 106.75 | 25.12 | Up   | Others |
| LC | Lactosylceramide (d18:1/12:0)                   | 6.14   | 7.99  | 53.11  | 40.25 | Down | Others |
| GC | Leucrose                                        | 0.26   | 0.21  | 0.10   | 0.09  | Up   | Others |
| LC | Lithocholate 3-O-glucuronide                    | 1.97   | 1.59  | 4.35   | 1.41  | Down | Others |
| GC | L-Malic acid                                    | 0.50   | 0.29  | 0.24   | 0.10  | Up   | Others |
| GC | Maleimide                                       | 0.40   | 0.14  | 0.23   | 0.05  | Up   | Others |
| GC | malonic acid                                    | 5.89   | 3.17  | 8.54   | 1.55  | Down | Others |
| GC | Mevalonic acid lactone                          | 10.63  | 2.92  | 8.46   | 1.18  | Up   | Others |
| GC | oxalic acid                                     | 12.54  | 3.60  | 9.76   | 1.47  | Up   | Others |
| GC | oxoproline                                      | 31.29  | 12.36 | 22.46  | 2.97  | Up   | Others |
| GC | Pelargonic acid                                 | 0.57   | 0.16  | 0.45   | 0.05  | Up   | Others |
| LC | Pregnanetriol                                   | 59.67  | 23.14 | 106.14 | 41.55 | Down | Others |
| GC | Sedoheptulose                                   | 1.78   | 0.56  | 2.41   | 0.58  | Down | Others |

|    |                                    |        |        |        |       |      |        |
|----|------------------------------------|--------|--------|--------|-------|------|--------|
| GC | succinic acid                      | 5.35   | 3.32   | 2.42   | 0.48  | Up   | Others |
| LC | Tetracosatetraenoic acid (24:4n-6) | 30.07  | 12.95  | 46.27  | 10.01 | Down | Others |
| GC | uracil                             | 0.73   | 0.49   | 0.38   | 0.09  | Up   | Others |
| GC | urea                               | 448.07 | 136.91 | 349.45 | 43.47 | Up   | Others |



**Table S3C. Differential hippocampus metabolites between SCZ microbiota and HC microbiota recipient mice.**

| Platform | Metabolites                                             | Relative Abundance in 'SCZ microbiota' recipient mice |         | Relative Abundance in 'HC microbiota' recipient mice |         | SCZ/HC | KEGG pathway          |
|----------|---------------------------------------------------------|-------------------------------------------------------|---------|------------------------------------------------------|---------|--------|-----------------------|
| GC       | glutamic acid                                           | 172.18                                                | 13.62   | 192.49                                               | 26.65   | Down   | Amino acid metabolism |
| GC       | Glutamine                                               | 0.65                                                  | 0.08    | 0.56                                                 | 0.07    | Up     | Amino acid metabolism |
| GC       | asparagine                                              | 0.51                                                  | 0.22    | 0.31                                                 | 0.04    | Up     | Amino acid metabolism |
| GC       | aspartic acid                                           | 182.34                                                | 37.72   | 210.21                                               | 13.05   | Down   | Amino acid metabolism |
| GC       | beta-Alanine                                            | 0.21                                                  | 0.04    | 0.14                                                 | 0.03    | Down   | Amino acid metabolism |
| GC       | D-alanyl-D-alanine                                      | 0.40                                                  | 0.12    | 0.67                                                 | 0.15    | Down   | Amino acid metabolism |
| LC       | Glutathione                                             | 2568.81                                               | 858.44  | 1772.78                                              | 676.83  | Up     | Amino acid metabolism |
| GC       | N-Acetyl-L-aspartic acid                                | 4.66                                                  | 0.30    | 4.31                                                 | 0.28    | Up     | Amino acid metabolism |
| LC       | Oxidized glutathione                                    | 2976.95                                               | 1085.08 | 4880.24                                              | 1505.56 | Down   | Amino acid metabolism |
| GC       | proline                                                 | 4.09                                                  | 0.19    | 3.68                                                 | 0.57    | Up     | Amino acid metabolism |
| GC       | taurine                                                 | 3.51                                                  | 0.97    | 4.83                                                 | 0.69    | Down   | Amino acid metabolism |
| GC       | threonine                                               | 0.36                                                  | 0.08    | 0.20                                                 | 0.15    | Up     | Amino acid metabolism |
| LC       | DG(22:6(4Z,7Z,10Z,13Z,16Z,19Z)/20:4(5Z,8Z,11Z,14Z)/0:0) | 549.40                                                | 473.61  | 1324.64                                              | 700.69  | Down   | Lipids metabolism     |
| LC       | Glucosylceramide (d18:1/16:0)                           | 595.37                                                | 172.71  | 825.15                                               | 283.53  | Down   | Lipids metabolism     |
| LC       | LysoPC(18:1(9Z))                                        | 62397.31                                              | 9621.14 | 70547.15                                             | 6097.75 | Down   | Lipids metabolism     |
| LC       | LysoPC(18:2(9Z,12Z))                                    | 2169.38                                               | 263.77  | 2462.55                                              | 230.19  | Down   | Lipids metabolism     |
| LC       | LysoPC(20:3(8Z,11Z,14Z))                                | 964.70                                                | 274.36  | 1318.52                                              | 228.87  | Down   | Lipids metabolism     |
| LC       | LysoPC(20:4(5Z,8Z,11Z,14Z))                             | 19688.35                                              | 5478.30 | 26503.15                                             | 4433.16 | Down   | Lipids metabolism     |
| LC       | LysoPC(22:4(7Z,10Z,13Z,16Z))                            | 1126.95                                               | 252.12  | 1482.07                                              | 209.12  | Down   | Lipids metabolism     |
| LC       | LysoPC(22:5(7Z,10Z,13Z,16Z,19Z))                        | 648.38                                                | 162.79  | 823.26                                               | 139.85  | Down   | Lipids metabolism     |

|    |                                                      |          |          |          |         |      |                   |
|----|------------------------------------------------------|----------|----------|----------|---------|------|-------------------|
| LC | LysoPC(22:6(4Z,7Z,10Z,13Z,16Z,19Z))                  | 12399.78 | 2977.05  | 15358.76 | 2442.17 | Down | Lipids metabolism |
| LC | LysoPE(20:4(8Z,11Z,14Z,17Z)/0:0)                     | 13334.00 | 2699.71  | 16257.19 | 2791.53 | Down | Lipids metabolism |
| LC | LysoPE(22:4(7Z,10Z,13Z,16Z)/0:0)                     | 2633.38  | 478.02   | 3265.41  | 480.13  | Down | Lipids metabolism |
| LC | LysoPE(22:6(4Z,7Z,10Z,13Z,16Z,19Z)/0:0)              | 11336.50 | 1705.24  | 9025.47  | 2838.69 | Up   | Lipids metabolism |
| LC | PC(16:0/16:0)                                        | 18131.71 | 16678.20 | 37543.99 | 9896.96 | Down | Lipids metabolism |
| LC | PC(20:3(8Z,11Z,14Z)/20:1(11Z))                       | 624.09   | 216.21   | 1035.73  | 453.21  | Down | Lipids metabolism |
| LC | PC(20:4(8Z,11Z,14Z,17Z)/22:6(4Z,7Z,10Z,13Z,16Z,19Z)) | 366.25   | 347.74   | 742.80   | 329.84  | Down | Lipids metabolism |
| LC | PC(MonoMe(9,5)/MonoMe(11,5))                         | 1264.72  | 142.73   | 1446.07  | 110.74  | Down | Lipids metabolism |
| LC | PC(o-22:0/20:1(11Z))                                 | 318.10   | 102.75   | 543.21   | 255.53  | Down | Lipids metabolism |
| LC | PE(14:0/22:6(4Z,7Z,10Z,13Z,16Z,19Z))                 | 403.12   | 403.02   | 795.90   | 431.94  | Down | Lipids metabolism |
| LC | PE(18:1(11Z)/18:2(9Z,12Z))                           | 191.14   | 137.36   | 399.15   | 186.38  | Down | Lipids metabolism |
| LC | PE(20:4(8Z,11Z,14Z,17Z)/18:2(9Z,12Z))                | 368.20   | 354.11   | 771.95   | 340.10  | Down | Lipids metabolism |
| LC | PE(20:4(8Z,11Z,14Z,17Z)/20:4(8Z,11Z,14Z,17Z))        | 1643.69  | 1269.10  | 2739.03  | 886.80  | Down | Lipids metabolism |
| LC | PE(22:2(13Z,16Z)/18:1(11Z))                          | 690.61   | 568.32   | 1272.60  | 556.66  | Down | Lipids metabolism |
| LC | PE(22:4(7Z,10Z,13Z,16Z)/22:6(4Z,7Z,10Z,13Z,16Z,19Z)) | 1271.84  | 682.56   | 1858.62  | 449.82  | Down | Lipids metabolism |
| LC | PE(22:4(7Z,10Z,13Z,16Z)/P-18:0)                      | 755.52   | 157.46   | 1100.13  | 378.12  | Down | Lipids metabolism |
| LC | PE(22:6(4Z,7Z,10Z,13Z,16Z,19Z)/18:0)                 | 10704.76 | 8068.20  | 17228.92 | 3879.06 | Down | Lipids metabolism |
| LC | PE(22:6(4Z,7Z,10Z,13Z,16Z,19Z)/18:1(9Z))             | 4427.50  | 3116.73  | 7734.83  | 3047.53 | Down | Lipids metabolism |
| LC | PE(22:6(4Z,7Z,10Z,13Z,16Z,19Z)/20:4(5Z,8Z,11Z,14Z))  | 3642.89  | 839.27   | 4517.20  | 745.87  | Down | Lipids metabolism |
| LC | PE(O-16:1(1Z)/22:6(4Z,7Z,10Z,13Z,16Z,19Z))           | 22646.23 | 15229.81 | 35307.36 | 9030.59 | Down | Lipids metabolism |

|    |                                                                 |         |         |          |         |      |                   |
|----|-----------------------------------------------------------------|---------|---------|----------|---------|------|-------------------|
| LC | PE(P-18:1(9Z)/22:6(4Z,7Z,10Z,13Z,16Z,19Z))                      | 2209.94 | 1858.70 | 3678.05  | 1164.39 | Down | Lipids metabolism |
| LC | PG(16:0/20:4(5Z,8Z,11Z,14Z))                                    | 956.96  | 933.93  | 2232.89  | 793.32  | Down | Lipids metabolism |
| LC | PG(16:0/22:4(7Z,10Z,13Z,16Z))                                   | 756.05  | 456.13  | 1350.02  | 575.77  | Down | Lipids metabolism |
| LC | PG(18:3(9Z,12Z,15Z)/18:0)                                       | 882.83  | 301.42  | 1281.93  | 206.02  | Down | Lipids metabolism |
| LC | PG(18:3(9Z,12Z,15Z)/18:1(9Z))                                   | 1577.92 | 356.75  | 2066.93  | 231.96  | Down | Lipids metabolism |
| LC | PGP(18:0/22:4(7Z,10Z,13Z,16Z))                                  | 282.29  | 248.21  | 591.52   | 194.05  | Down | Lipids metabolism |
| LC | PGP(18:1(11Z)/22:5(7Z,10Z,13Z,16Z,19Z))                         | 2731.28 | 2286.53 | 6988.24  | 3486.28 | Down | Lipids metabolism |
| LC | PGP(18:2(9Z,12Z)/20:3(8Z,11Z,14Z))                              | 241.07  | 234.26  | 524.34   | 227.00  | Down | Lipids metabolism |
| LC | PI(20:4(8Z,11Z,14Z,17Z)/16:0)                                   | 1938.59 | 1400.40 | 3612.22  | 1050.28 | Down | Lipids metabolism |
| LC | PI(22:5(4Z,7Z,10Z,13Z,16Z)/16:0)                                | 211.75  | 199.34  | 459.53   | 181.32  | Down | Lipids metabolism |
| LC | PI(22:5(7Z,10Z,13Z,16Z,19Z)/16:0)                               | 1696.96 | 1542.73 | 3680.54  | 1444.63 | Down | Lipids metabolism |
| LC | PS(18:0/16:1(9Z))                                               | 415.51  | 391.69  | 1123.24  | 654.00  | Down | Lipids metabolism |
| LC | PS(18:0/22:6(4Z,7Z,10Z,13Z,16Z,19Z))                            | 9351.44 | 4212.25 | 13096.06 | 3211.14 | Down | Lipids metabolism |
| LC | PS(22:6(4Z,7Z,10Z,13Z,16Z,19Z)/18:0)                            | 5204.97 | 3864.22 | 8748.21  | 3041.56 | Down | Lipids metabolism |
| LC | SM(d18:0/12:0)                                                  | 863.69  | 635.29  | 1458.72  | 493.17  | Down | Lipids metabolism |
| LC | SM(d18:1/18:1(9Z))                                              | 1081.16 | 159.07  | 1364.70  | 329.20  | Down | Lipids metabolism |
| LC | TG(18:4(6Z,9Z,12Z,15Z)/18:4(6Z,9Z,12Z,15Z)/18:4(6Z,9Z,12Z,15Z)) | 519.01  | 130.45  | 819.92   | 343.43  | Down | Lipids metabolism |
| LC | TG(20:5(5Z,8Z,11Z,14Z,17Z)/18:4(6Z,9Z,12Z,15Z)/o-18:0)          | 363.09  | 88.13   | 568.98   | 235.42  | Down | Lipids metabolism |
| GC | (S)-Mandelic acid                                               | 0.71    | 0.11    | 0.35     | 0.33    | Up   | Others            |
| LC | 15beta-Hydroxydesogestrel                                       | 1775.60 | 131.86  | 1552.35  | 92.13   | Up   | Others            |
| LC | 1-Arachidonoylglycerophosphoinositol                            | 1117.48 | 365.21  | 1555.03  | 333.54  | Down | Others            |
| LC | 1-Hydroxy-1-phenyl-3-hexadecanone                               | 1824.88 | 494.99  | 2653.49  | 610.55  | Down | Others            |
| GC | 1-Hydroxyanthraquinone                                          | 2.36    | 0.64    | 1.59     | 0.38    | Up   | Others            |

|    |                                          |          |         |          |         |      |        |
|----|------------------------------------------|----------|---------|----------|---------|------|--------|
| LC | 2-Acetyl-3-methylthiophene               | 272.54   | 94.72   | 530.71   | 99.92   | Down | Others |
| LC | 2-Arachidonylglycerol                    | 6839.65  | 276.96  | 6430.07  | 107.16  | Up   | Others |
| LC | 2-Dodecylbenzenesulfonic acid            | 12382.74 | 515.55  | 11500.69 | 500.76  | Up   | Others |
| LC | 2-Phenylaminoadenosine                   | 810.62   | 161.37  | 992.53   | 33.56   | Down | Others |
| GC | 3-Aminoisobutyric acid                   | 59.94    | 13.01   | 31.44    | 10.71   | Up   | Others |
| LC | 3-Hydroxyisovaleryl-CoA                  | 366.47   | 102.42  | 603.68   | 264.37  | Down | Others |
| LC | 3-O-Sulfogalactosylceramide (d18:1/22:0) | 381.81   | 344.03  | 692.59   | 274.29  | Down | Others |
| LC | 4,8,12,15,19-Docosapentaenoic acid       | 683.93   | 213.35  | 903.75   | 244.40  | Down | Others |
| GC | 4-aminobutyric acid                      | 26.41    | 10.70   | 9.89     | 2.37    | Up   | Others |
| GC | 4-Hydroxymandelic acid                   | 0.39     | 0.09    | 0.28     | 0.07    | Up   | Others |
| LC | 5a-Androstane-3b,17b-diol                | 1818.63  | 1508.88 | 483.99   | 132.16  | Up   | Others |
| LC | 8-Oxo-dGMP                               | 905.06   | 188.96  | 1078.56  | 170.79  | Down | Others |
| LC | Acetyl-CoA                               | 422.34   | 133.60  | 672.59   | 283.34  | Down | Others |
| GC | Allo-inositol                            | 0.20     | 0.05    | 0.10     | 0.09    | Up   | Others |
| GC | alpha-Amino adipic acid                  | 0.06     | 0.05    | 0.12     | 0.03    | Down | Others |
| LC | Alpha-CEHC                               | 2772.15  | 197.97  | 2526.91  | 98.58   | Up   | Others |
| LC | alpha-Hydroxytamoxifen                   | 320.51   | 252.72  | 78.04    | 25.89   | Up   | Others |
| LC | Alpha-Linolenic acid                     | 357.67   | 333.94  | 65.13    | 18.04   | Up   | Others |
| GC | Aminomalonic acid                        | 0.54     | 0.15    | 0.86     | 0.17    | Down | Others |
| LC | CE(15:0)                                 | 949.16   | 146.00  | 1167.43  | 124.94  | Down | Others |
| LC | Cer(d18:1/18:1(11Z))                     | 1846.96  | 1420.83 | 3398.31  | 1431.29 | Down | Others |
| LC | Citalopram propionic acid                | 805.16   | 215.84  | 1017.04  | 33.47   | Down | Others |
| GC | creatine degr                            | 1.80     | 1.79    | 0.18     | 0.15    | Up   | Others |
| LC | Cysteineglutathione disulfide            | 1737.78  | 616.87  | 2833.23  | 962.02  | Down | Others |
| LC | Docosahexaenoic acid                     | 11552.43 | 2029.52 | 13670.55 | 2060.71 | Down | Others |

|    |                               |         |        |         |        |      |        |
|----|-------------------------------|---------|--------|---------|--------|------|--------|
| LC | Ethyl tetradecanoate          | 2607.59 | 332.01 | 3343.01 | 805.81 | Down | Others |
| GC | Hesperitin                    | 5.77    | 1.03   | 4.41    | 0.82   | Up   | Others |
| LC | Hydrogen phosphate            | 5352.26 | 251.43 | 5101.68 | 156.61 | Up   | Others |
| LC | L-Cysteinylglycine disulfide  | 354.09  | 123.59 | 578.45  | 188.17 | Down | Others |
| GC | malonic acid                  | 0.66    | 0.18   | 0.48    | 0.05   | Up   | Others |
| GC | Methyl Palmitoleate           | 0.38    | 0.10   | 0.29    | 0.04   | Up   | Others |
| GC | Methylmalonic acid            | 0.58    | 0.82   | 1.93    | 0.30   | Down | Others |
| GC | nicotinamide                  | 3.89    | 0.21   | 4.12    | 0.17   | Down | Others |
| LC | N-Undecylbenzenesulfonic acid | 7714.09 | 320.14 | 7173.04 | 310.91 | Up   | Others |
| GC | O-methylthreonine             | 0.26    | 0.11   | 0.13    | 0.16   | Up   | Others |
| GC | O-Phosphorylethanolamine      | 2.02    | 0.43   | 3.60    | 0.85   | Down | Others |
| GC | phosphate                     | 19.30   | 2.07   | 16.08   | 1.68   | Up   | Others |
| GC | phosphomycin                  | 13.74   | 1.76   | 11.53   | 1.17   | Up   | Others |
| LC | Pipericine                    | 1549.97 | 346.89 | 1265.61 | 98.38  | Up   | Others |
| LC | Piperochromenoic acid         | 2483.42 | 89.96  | 2312.74 | 74.94  | Up   | Others |
| LC | Ribose-1-arsenate             | 886.94  | 265.16 | 682.78  | 110.47 | Up   | Others |
| LC | S-3-oxodecanoyl cysteamine    | 1248.39 | 773.74 | 635.98  | 128.30 | Up   | Others |
| GC | stearic acid                  | 16.63   | 3.80   | 13.67   | 1.58   | Up   | Others |
| GC | terephthalic acid             | 0.33    | 0.11   | 0.22    | 0.05   | Up   | Others |
| LC | Zinc acetate                  | 844.14  | 287.77 | 585.49  | 217.85 | Up   | Others |
